# Supplementary material for: Minimally destructive sampling of type specimens of Pyropia (Bangiales, Rhodophyta) recovers complete plastid and mitochondrial genomes
Source: PubMed Central journal article supplement — Sci Rep. 2014 Jun 4;4:5113. doi: 10.1038/srep05113 (PMC4044621; doi:10.1038/srep05113), 2014-06-04
Supplement: srep05113-s3.pdf [file srep05113-s3.pdf]

## Supplementary Materials

### Unification of the type method with modern systematics using genomics

Jeffery R. Hughey, Paul W. Gabrielson, Laurence Rohmer, Jacquie Tortolani, Mayra Silva, Kathy Ann Miller, Joel D. Young, Craig Martell, Erik Ruediger

## Supplementary Methods

High-Throughput Genomics Center TruSeq Library Construction Protocol 06/28/11 mw

1- Initial fractionation step is skipped for degraded herbarium DNA

2- End-repair

Materials:

- Fractionated input DNA
- T4 DNA ligase buffer with 10mM ATP (NEB #B0202S)
- dNTP mix, 10mM each (NEB #N0447S)
- T4 DNA polymerase, 3U/ul (NEB #M0203L)
- Klenow DNA polymerase, 5U/ul (NEB #M0210L)
- T4 PNK, 10U/ul (NEB #M0201L)
- Cooling block or PCR machine
- QIAGEN MinElute kit

1. Prepare the following reaction mix:

|                                    |              |
|------------------------------------|--------------|
| Fractionated DNA                   | 18.6ul       |
| T4 DNA ligase buffer with 10mM ATP | 2.5ul        |
| dNTP mix                           | 1.0ul        |
| T4 DNA polymerase                  | 1.3ul        |
| Klenow DNA polymerase              | 0.3ul        |
| <u>T4 PNK</u>                      | <u>1.3ul</u> |
| Total Volume                       | 25ul         |

2. Incubate for 30min at 20°C

3. Purify using MinElute column with Buffer PB. Elute in 10ul of Buffer EB.

3- Addition of an 'A' Base to the 3' End of the DNA Fragments

Materials:

- DNA from last step
- 10X Klenow buffer (use NEB Buffer 2 that comes with Klenow exo<sup>-</sup>)
- dATP, 1mM (Fermentas #R0141)
- Klenow exo<sup>-</sup> (3' to 5' exo minus), 5U/ul (NEB #M0212L)
- Heat block or PCR machine

1. Prepare the following reaction mix:

|                                                    |              |
|----------------------------------------------------|--------------|
| DNA from last step                                 | 10.0ul       |
| Klenow buffer                                      | 1.5ul        |
| dATP                                               | 3.0ul        |
| <u>Klenow exo<sup>-</sup> (3' to 5' exo minus)</u> | <u>0.9ul</u> |
| Total Volume                                       | 15.4ul       |

2. Incubate for 30min at 37°C

3. Proceed directly to next step (no clean-up).

4- Ligation of TruSeq Adaptors to the Ends of the DNA Fragments

Materials:

- DNA from last step
- 2X DNA quick ligase buffer (buffer that comes with NEB Quick Ligation kit)
- Appropriate DNA Adapter index (from Illumina TruSeq kit)
- DNA quick ligase, 1U/ul (NEB #M2200L)
- Cooling block or PCR machine
- Stop Ligation Mix (from Illumina TruSeq kit)
- Agencourt AMPure XP kit (Beckman Coulter #A63881)
- Low-bind tubes (Fisher #13-6987-91)

1. Prepare the following reaction mix:

|                                   |              |
|-----------------------------------|--------------|
| DNA from last step                | 15.0ul       |
| 2x DNA quick ligase buffer        | 18.9ul       |
| DNA Adapter index (1:10 dilution) | 1.9ul        |
| <u>DNA quick ligase</u>           | <u>1.9ul</u> |
| Total Volume                      | 37.7ul       |

2. Incubate for 15min at 20°C.
3. Add 1ul Stop Ligation mix from Illumina TruSeq kit. Mix well.
4. Purify twice using AMPure XP beads. Elute in 20ul Buffer EB into low-bind tube.

## 5- AMPure Bead Clean-up

1. Let beads warm to room temp for at least 30 minutes. Mix well before using.
2. Add 1.8x volume (approx. 70ul) AMPure beads to post-ligation product and mix thoroughly by pipetting.
3. Let sit at room temp for 5 minutes.
4. Place on magnetic stand for 2-3 minutes or until clear.
5. Remove supernatant and discard. Do not disturb beads.
6. Add 180ul fresh 70% EtOH and let sit at room temp for 1 minute.
7. Remove supernatant and discard. Do not disturb beads.
8. Repeat EtOH wash two more times.
9. Remove supernatant and discard. Do not disturb beads. Let dry for 15 minutes.
10. Remove from stand. Add 22ul Buffer EB and mix thoroughly by pipetting. Let sit at room temp for 5 minutes.
11. Place on magnetic stand for 2-3 minutes or until clear.
12. Remove 20ul of supernatant and place in a low-bind tube. Do not disturb beads.

## 6- Enrichment of the PE Adaptor-modified DNA Fragments by PCR

Materials:

- DNA from last step
- PCR grade water
- Phusion High-Fidelity PCR Master Mix with GC Buffer (NEB #F532L)
- PCR primer cocktail, 1:2 dilution (from Illumina TruSeq kit)
- PCR machine

1. Prepare the following PCR reaction mix:

|                                    |                 |
|------------------------------------|-----------------|
| DNA                                | up to 20ul      |
| Phusion DNA polymerase             | 25ul            |
| PCR primer cocktail (1:2 dilution) | 1ul             |
| <u>Water</u>                       | <u>4 - 19ul</u> |
| Total Volume                       | 50ul            |

2. Use following rule of thumb for library input into PCR – if amount of starting material was 75-100ng, use 5ul of post-ligation product in PCR; 50-70ng, use 10ul; 30-45ng, use 15ul; less than 25ng, use 20ul.
3. Amplify using the following PCR protocol:
  - 30" at 98°C
  - [10" at 98°C, 30" at 60°C, 30" at 72°C] for 18 cycles
  - 5min at 72°C
  - Hold at 4°C

4. Store excess post-ligation product at  $-20^{\circ}\text{C}$ .

## 7- Final Fractionation and Clean-up

### Materials:

- QIAGEN MinElute gel purification kit
  - Isopropanol
  - Low-bind tubes (Fisher #13-6987-91)
1. Load entire enrichment product on a 2% agarose gel. Split sample into two lanes.
  2. Purify by cutting out darkest band from gel (size will vary depending on input to library). See gel image below for example. TruSeq adapters add approximately 120bp to length of fragments.
  3. Pool fragments from both lanes and weigh.
  4. Use the MinElute gel purification kit protocol with the following modifications to purify library.
  5. Add 6x volume of Buffer QG and allow gel slice to melt at room temp for 30-45min with occasional vortexing.
  6. Add 2X volume of Isopropanol and mix.
  7. Load sample into a QIAGEN MinElute column with syringe adaptor on vacuum manifold and let sit for 15min to allow small fragments to precipitate.
  8. Load sample on to column.
  9. Wash with 500ul Buffer QG.
  10. Add 750ul Buffer PE and let sit for five minutes.
  11. Do two more washes with Buffer PE. Spin to dry column.
  12. Add 15ul Buffer EB to column and let sit five minutes. Elute in low-bind tube.
  13. Repeat previous step with fresh Buffer EB (final volume is 30ul).
  14. Quantify using KAPA library quantification kit with PhiX standards.
  15. If making index pools, dilute each sample to 10nM with Buffer EB. Pool equal volumes of each sample for final pool of 10nM.

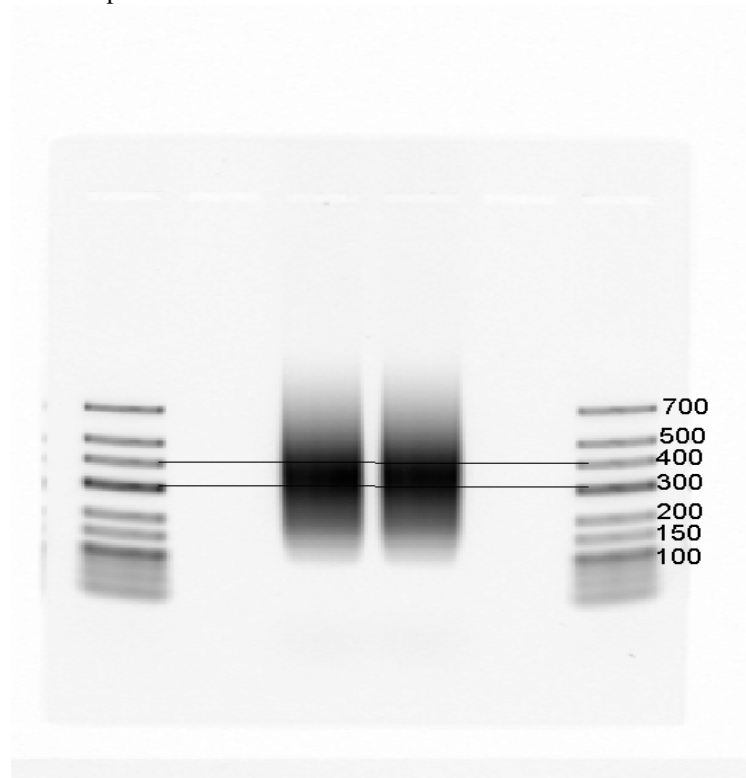

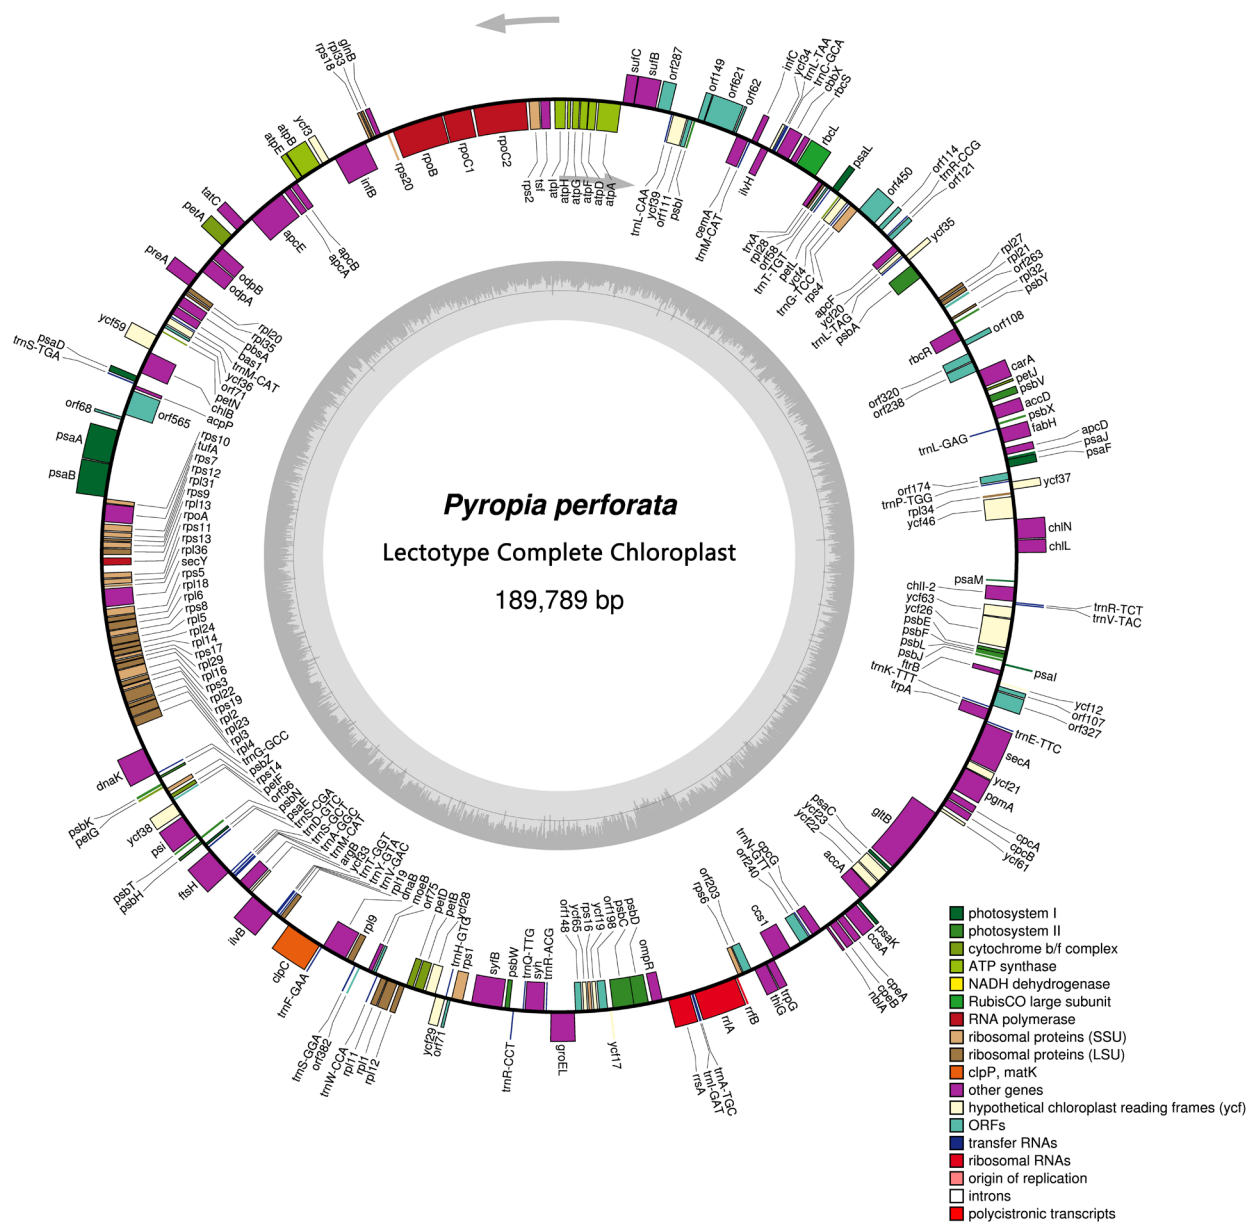

**Supplementary Figure 1.** The circular-mapping chloroplast genome of the lectotype specimen of *Pyropia perforata* (LD-Ag 13037, Near Golden Gate, San Francisco, California). Features transcribed clockwise are on the inside, while counter-clockwise transcriptions are on the outside, as indicated by the grey arrows. The color coding corresponds to genes of different groups as listed in the key to the bottom right. The GC content is shown in the inner grey circle. The map was drawn using OGDRAW<sup>1</sup>.

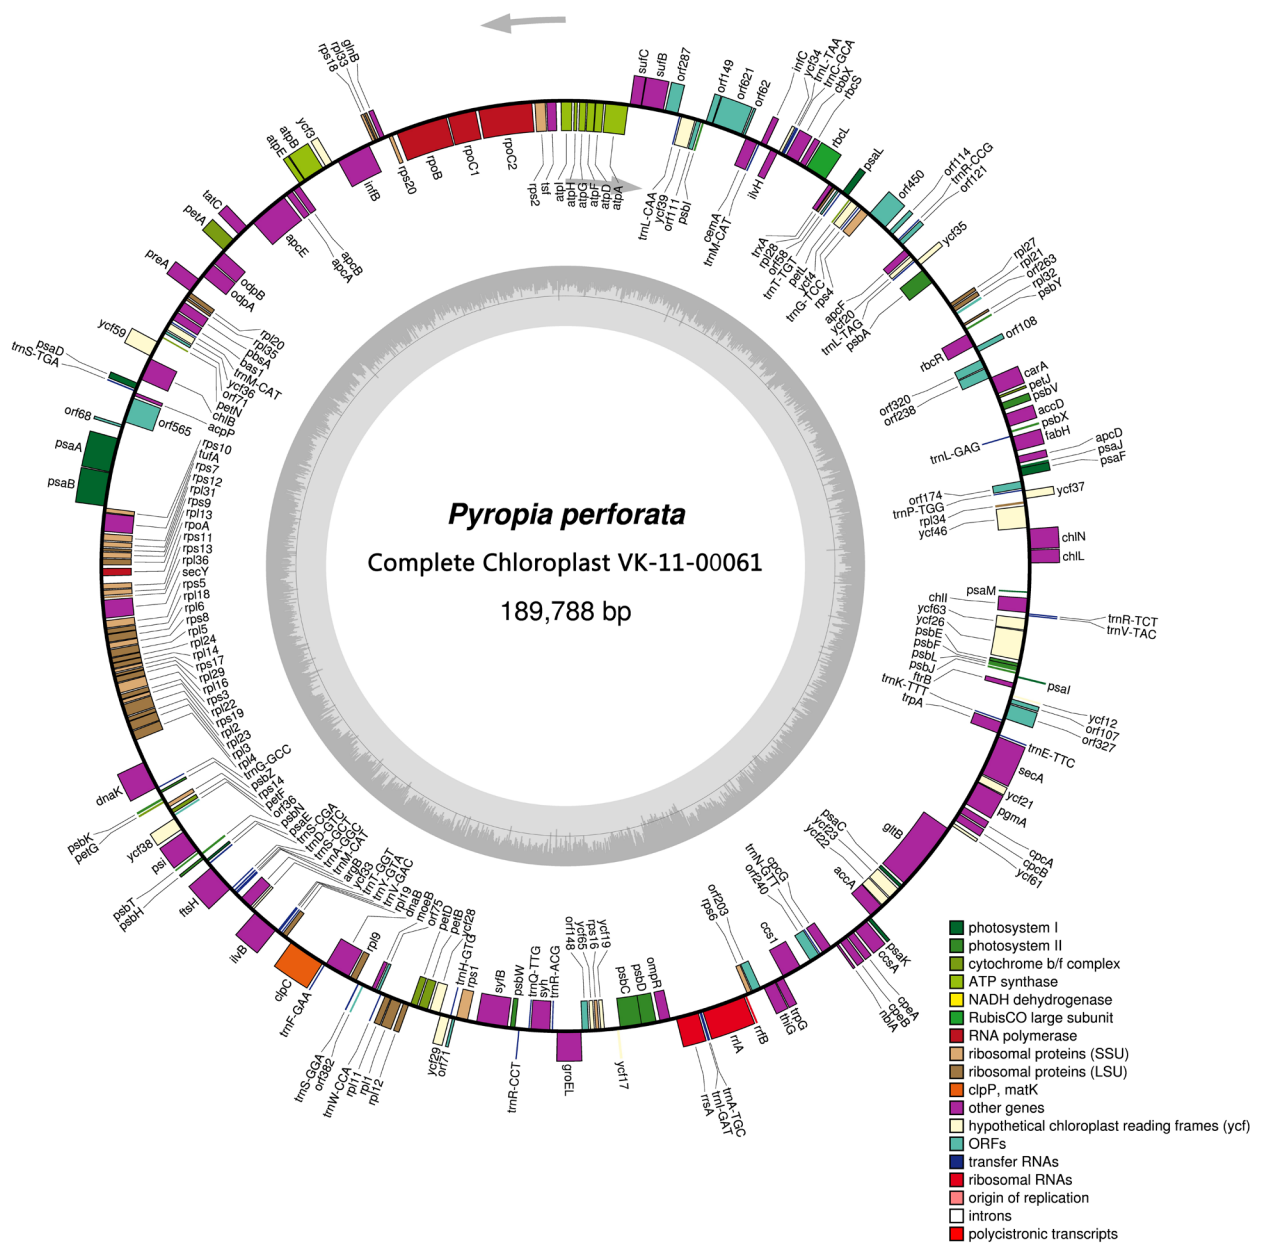

**Supplementary Figure 2.** The circular-mapping chloroplast genome of the holotype specimen of *Porphyra sanjuanensis* (VK-11-00061, Minnesota Reef, San Juan Island, Washington). Features transcribed clockwise are on the inside, while counter-clockwise transcriptions are on the outside, as indicated by the grey arrows. The color coding corresponds to genes of different groups as listed in the key to the bottom right. The GC content is shown in the inner grey circle. The map was drawn using OGDRAW<sup>1</sup>.

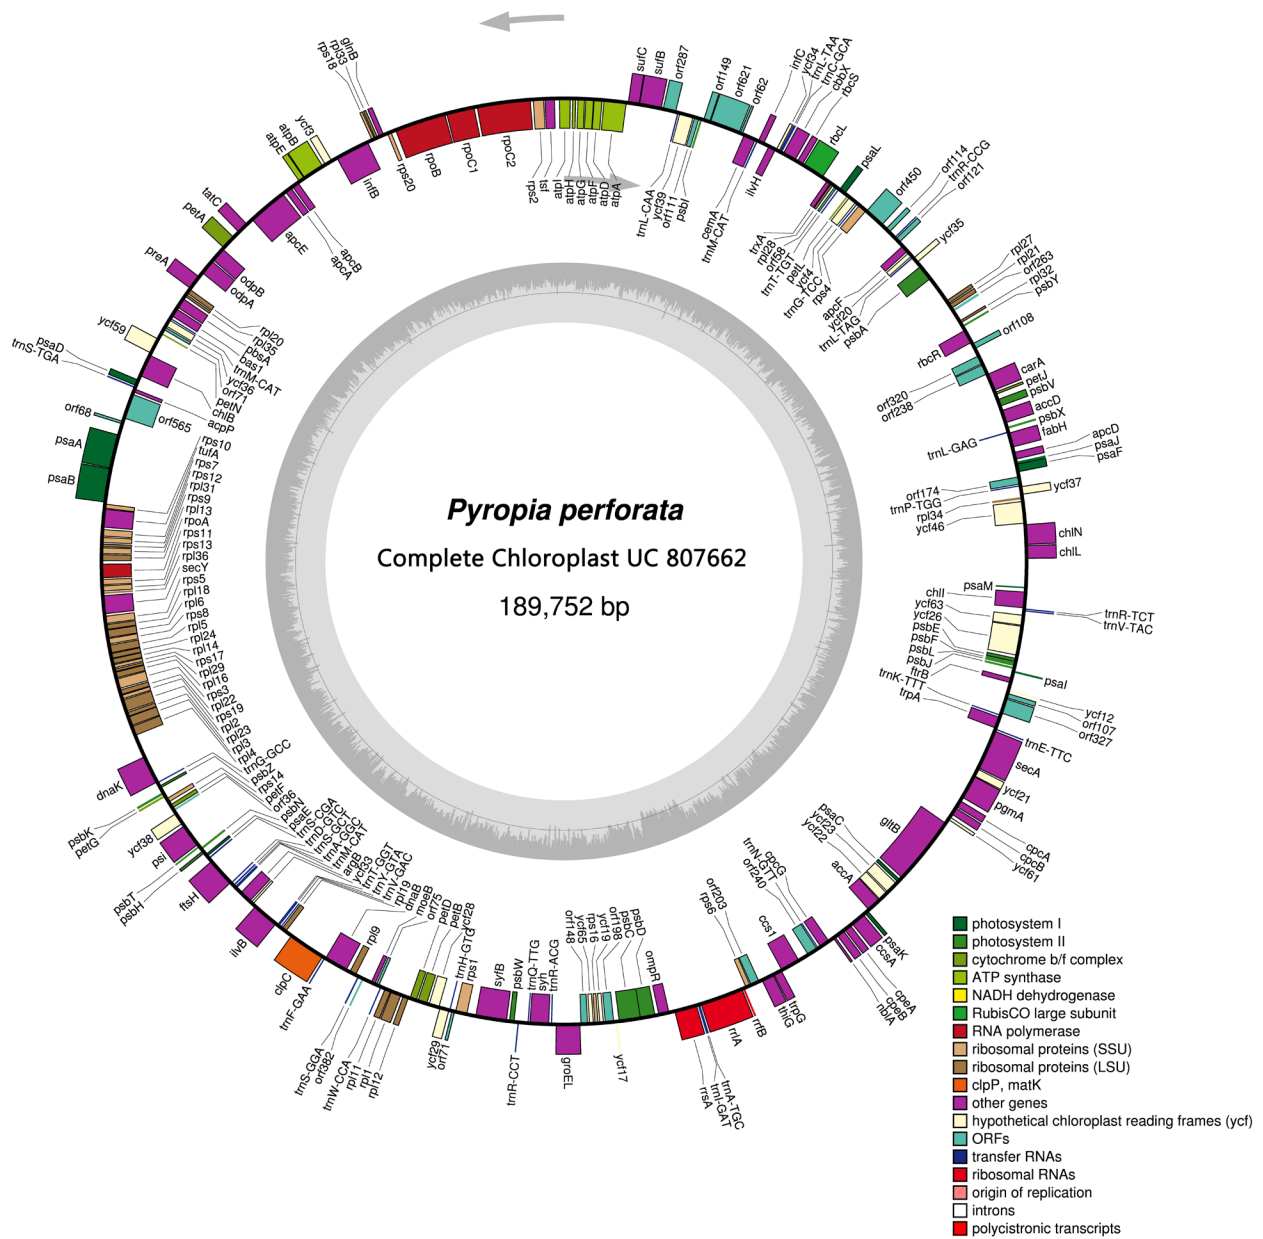

**Supplementary Figure 3.** The circular-mapping chloroplast genome of the syntype specimen of *Porphyra perforata* f. *segregata* (UC 807662, La Jolla, California). Features transcribed clockwise are on the inside, while counter-clockwise transcriptions are on the outside, as indicated by the grey arrows. The color coding corresponds to genes of different groups as listed in the key to the bottom right. The GC content is shown in the inner grey circle. The map was drawn using OGDRAW<sup>1</sup>.

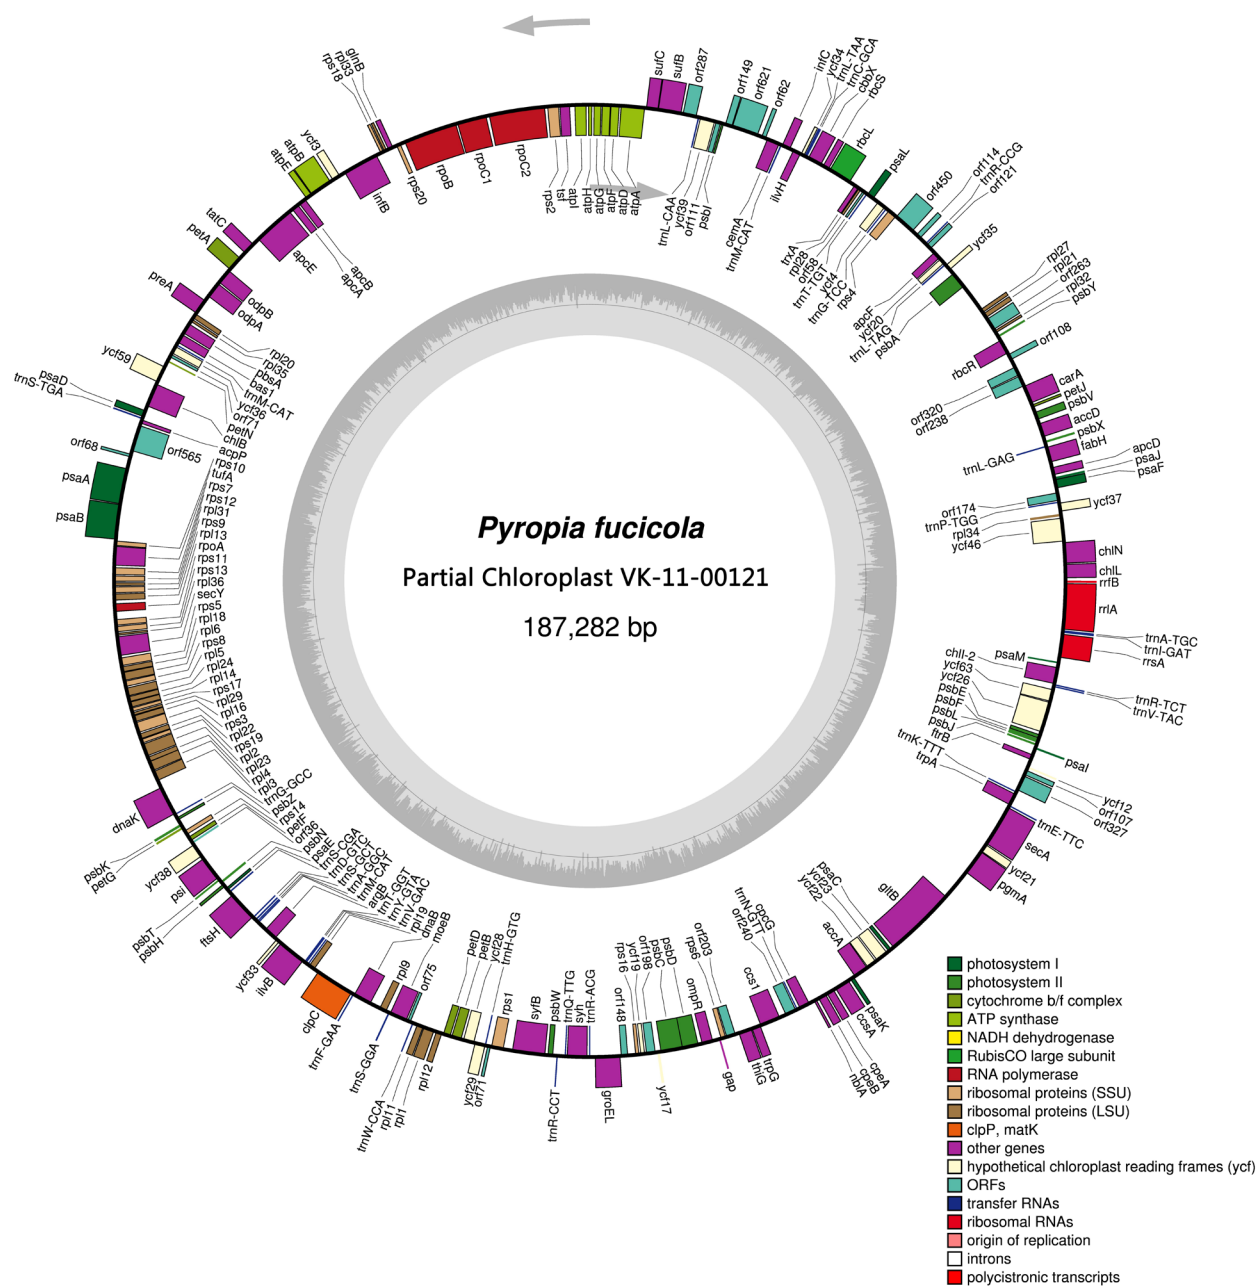

**Supplementary Figure 4.** The circular-mapping chloroplast genome of the holotype specimen of *Pyropia fucicola* (VK-11-00121, Makah Bay, Washington). Features transcribed clockwise are on the inside, while counter-clockwise transcriptions are on the outside, as indicated by the grey arrows. The color coding corresponds to genes of different groups as listed in the key to the bottom right. The GC content is shown in the inner grey circle. The region identified as ‘Gap’ is predicted to represent an approximately 4.8 kb non-identical ribosomal 16S, 23S, and 5S repeat. The map was drawn using OGDRAW<sup>1</sup>.

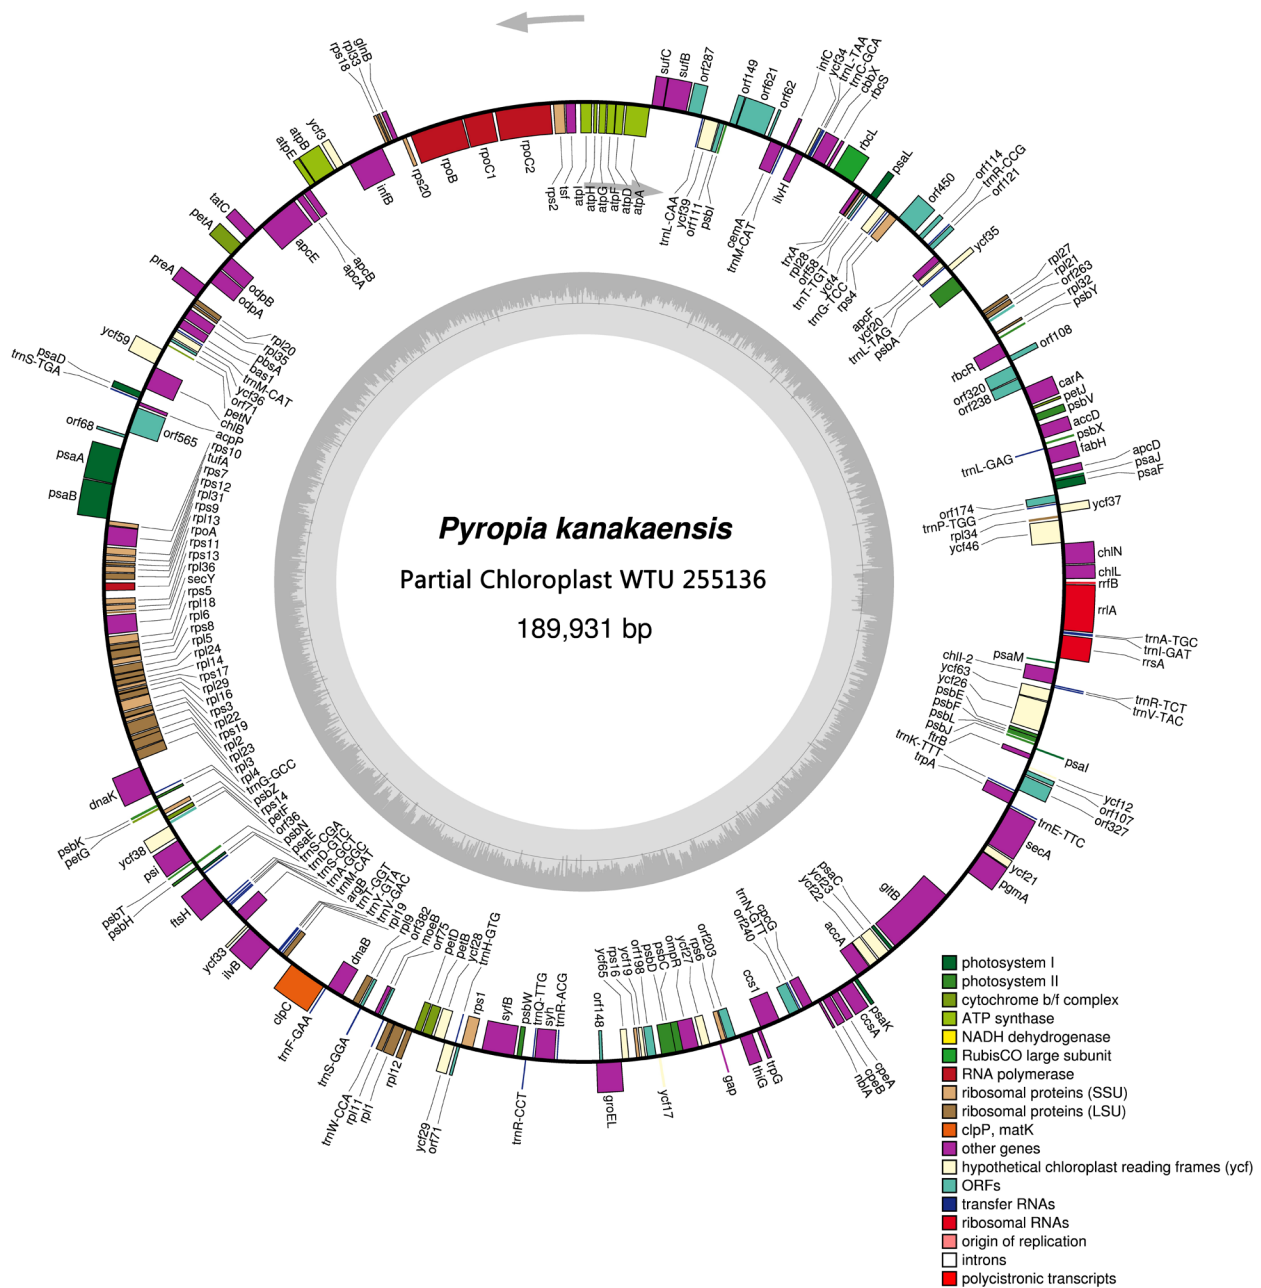

**Supplementary Figure 5.** The circular-mapping chloroplast genome of the holotype specimen of *Pyropia kanakaensis* (WTU 255136, Kanaka Bay, San Juan Is., Washington). Features transcribed clockwise are on the inside, while counter-clockwise transcriptions are on the outside, as indicated by the grey arrows. The color coding corresponds to genes of different groups as listed in the key to the bottom right. The GC content is shown in the inner grey circle. The region identified as ‘Gap’ is predicted to represent an approximately 4.8 kb non-identical ribosomal 16S, 23S, and 5S repeat. The map was drawn using OGDRAW<sup>1</sup>.



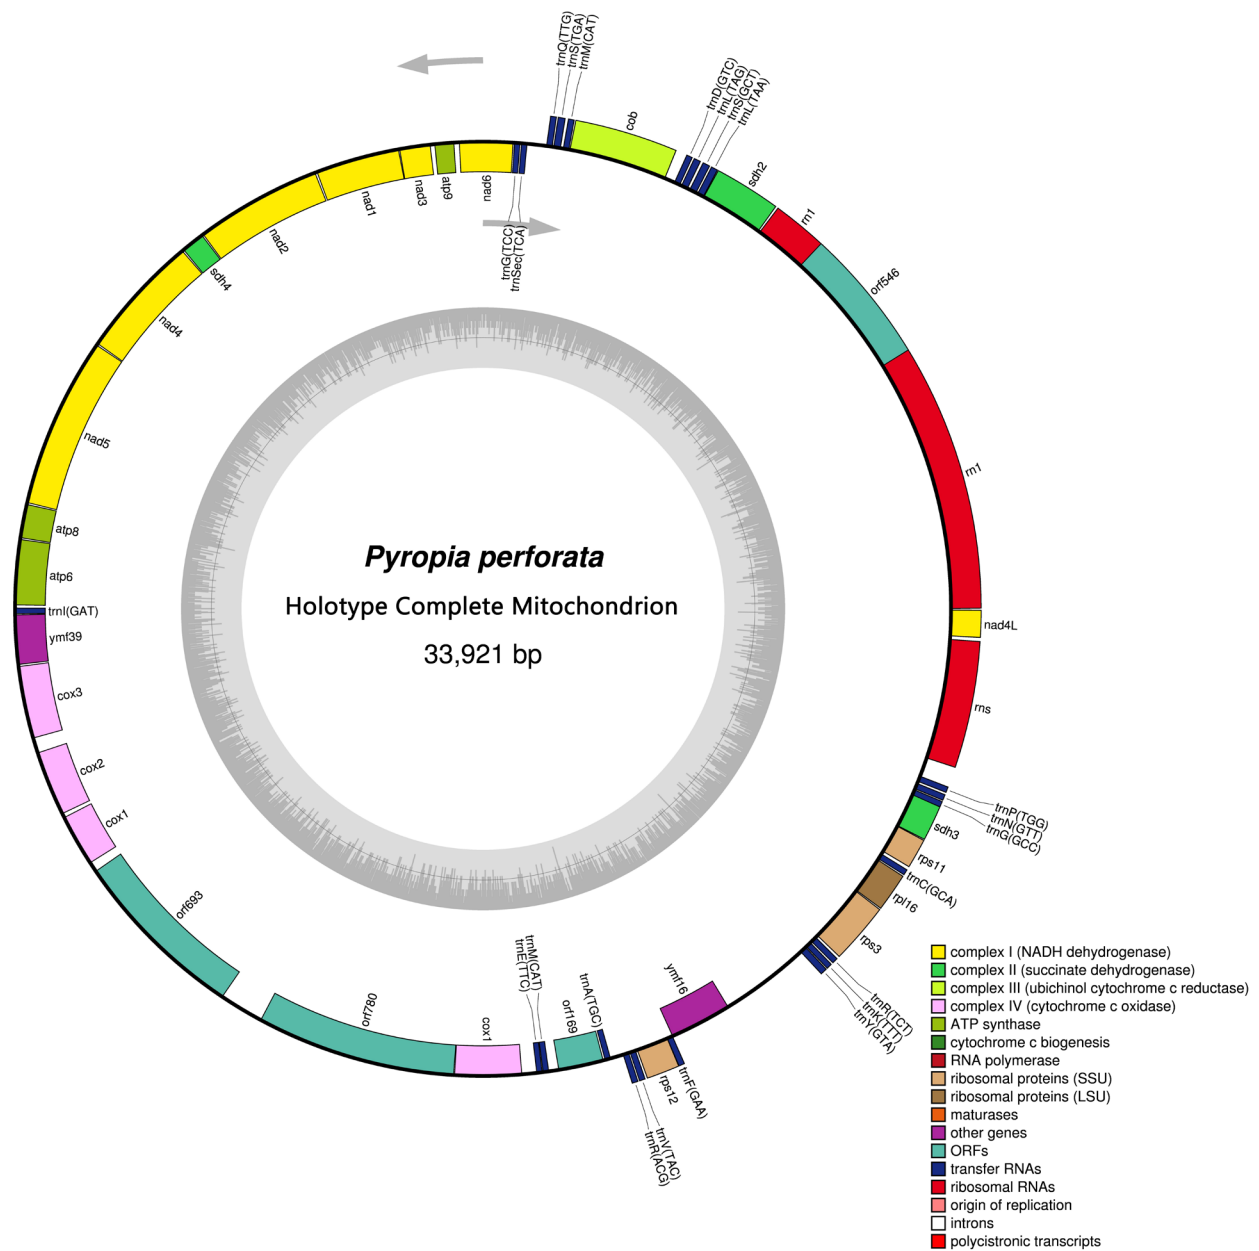

**Supplementary Figure 6.** The circular-mapping mitochondrial genome of the lectotype specimen of *Pyropia perforata* (LD-Ag 13037, Near Golden Gate, San Francisco, California). Features transcribed clockwise are on the inside, while counter-clockwise transcriptions are on the outside, as indicated by the grey arrows. The color coding corresponds to genes of different groups as listed in the key to the bottom right. The GC content is shown in the inner grey circle. The map was drawn using OGDRAW<sup>1</sup>.

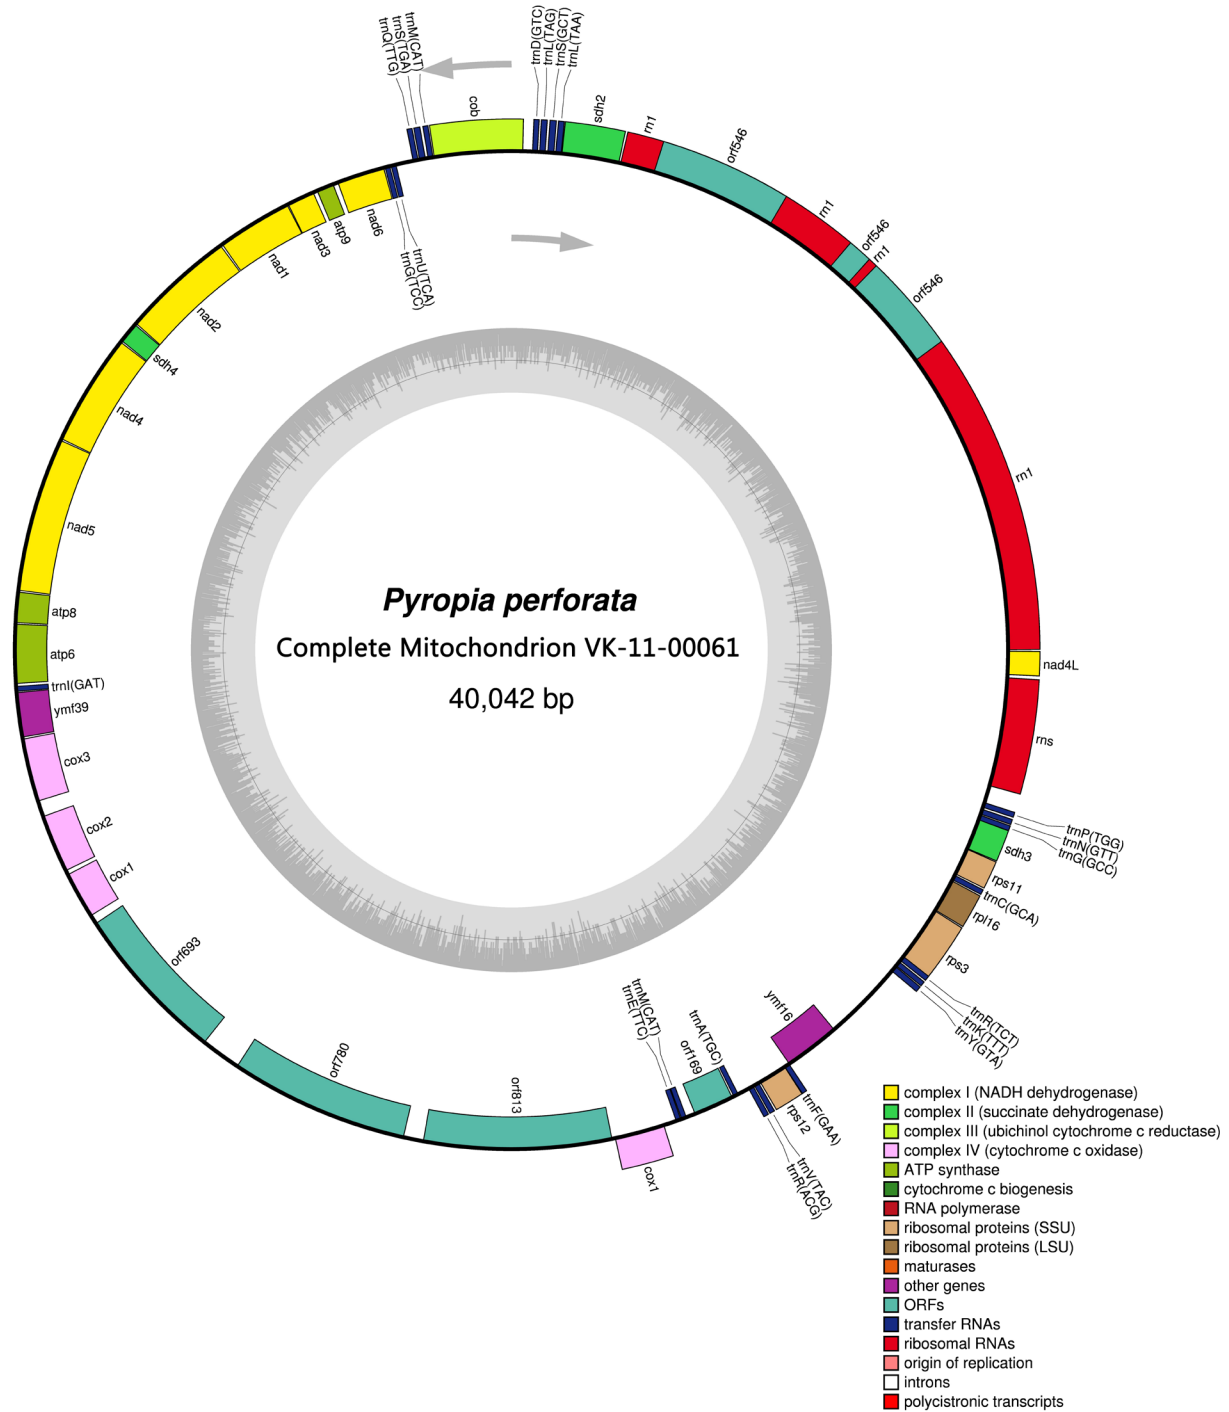

**Supplementary Figure 7.** The circular-mapping mitochondrial genome of the holotype specimen of *Porphyra sanjuanensis* (VK-11-00061, Minnesota Reef, San Juan Island, Washington). Features transcribed clockwise are on the inside, while counter-clockwise transcriptions are on the outside, as indicated by the grey arrows. The color coding corresponds to genes of different groups as listed in the key to the bottom right. The GC content is shown in the inner grey circle. The map was drawn using OGDRAW<sup>1</sup>.

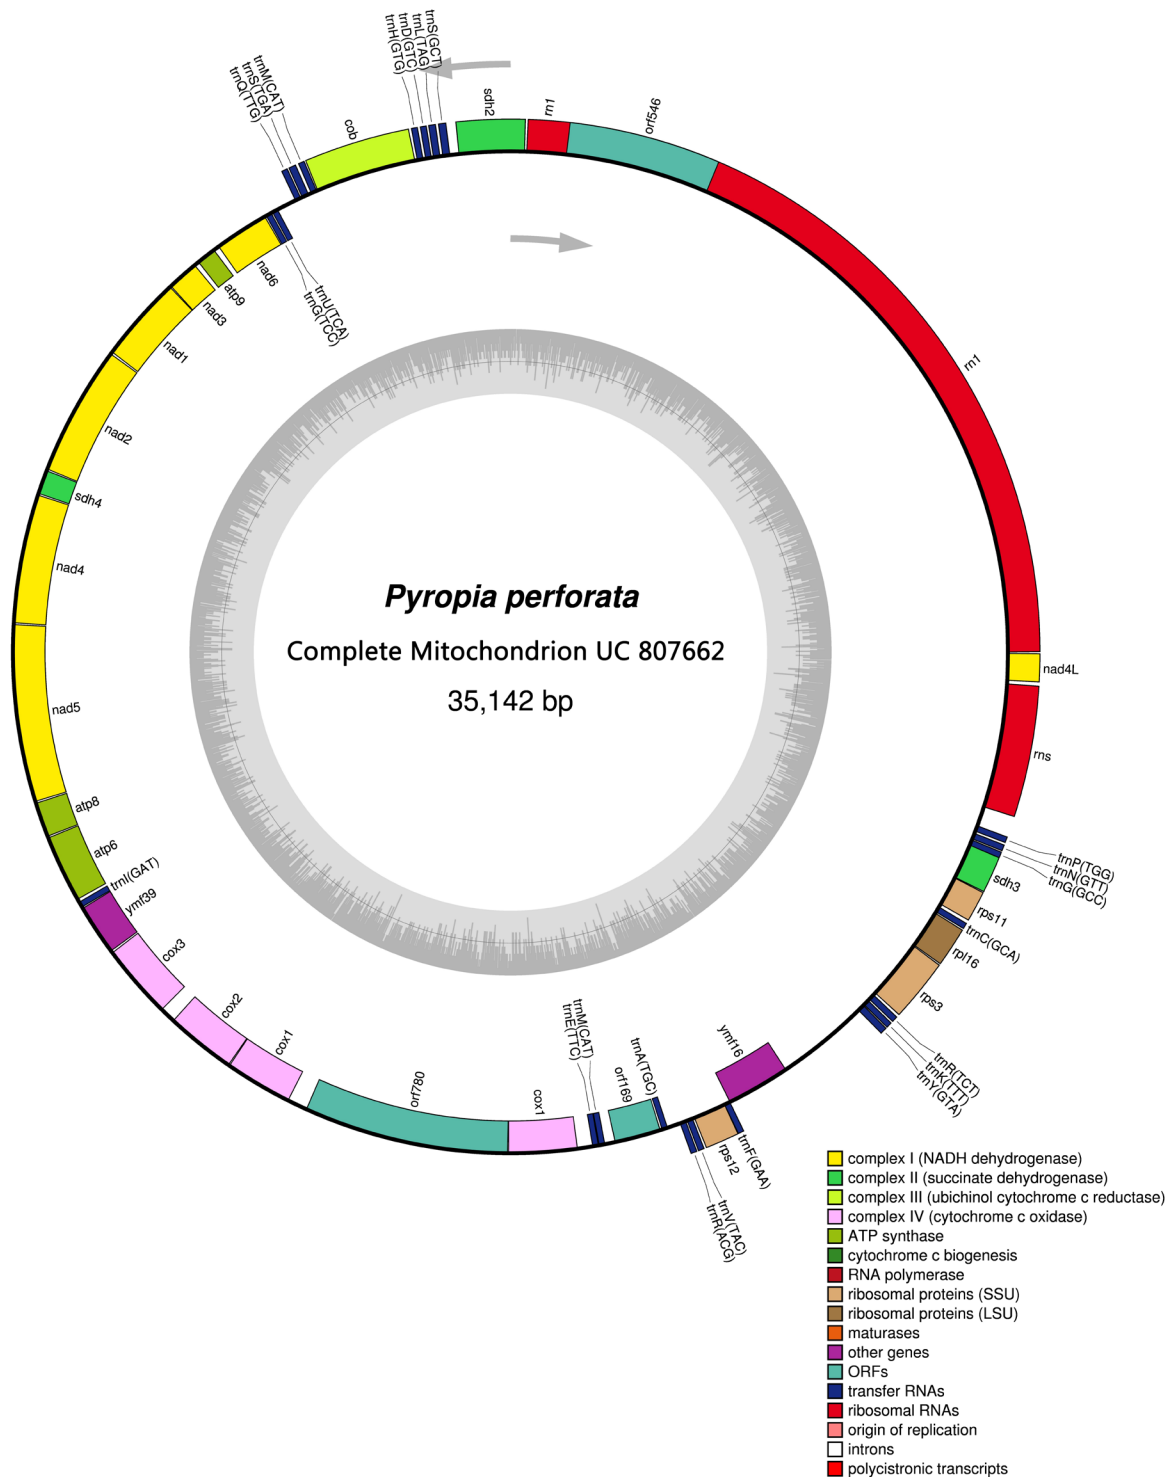

**Supplementary Figure 8.** The circular-mapping mitochondrial genome of the syntype specimen of *Porphyra perforata* f. *segregata* (UC 807662, La Jolla, California). Features transcribed clockwise are on the inside, while counter-clockwise transcriptions are on the outside, as indicated by the grey arrows. The color coding corresponds to genes of different groups as listed in the key to the bottom right. The GC content is shown in the inner grey circle. The map was drawn using OGDRAW<sup>1</sup>.

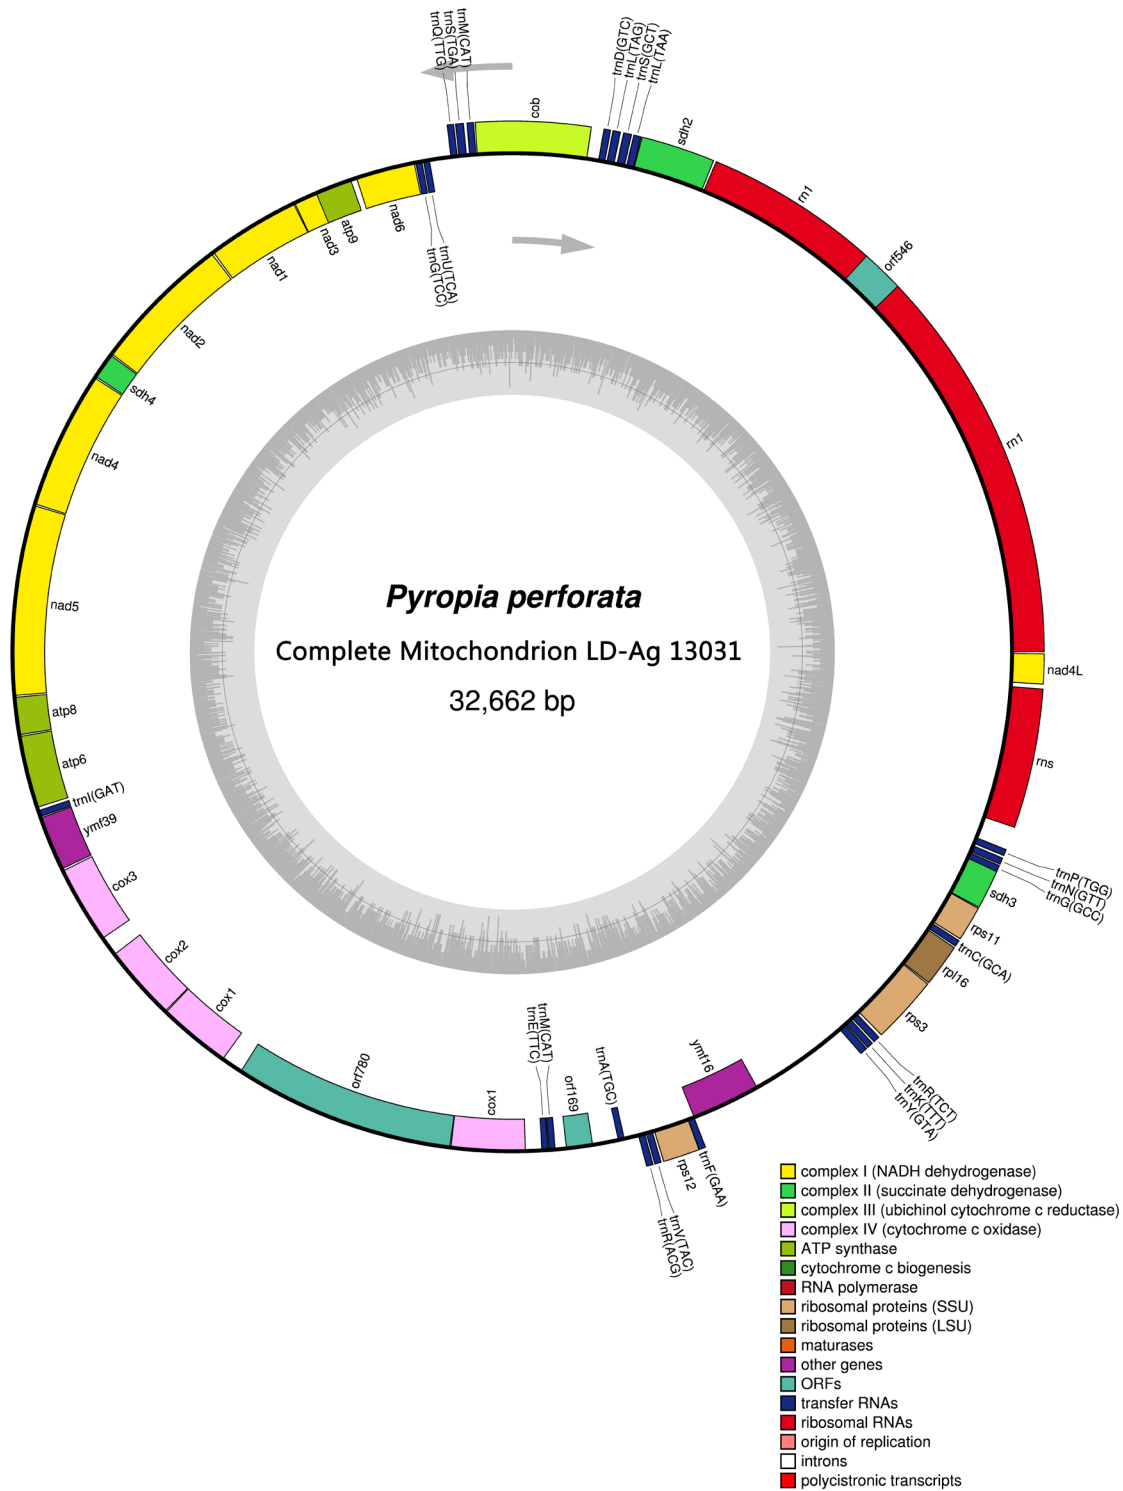

**Supplementary Figure 9.** The circular-mapping mitochondrial genome of the syntype specimen of *Pyropia perforata* (LD-Ag 13031, Santa Barbara, California). Features transcribed clockwise are on the inside, while counter-clockwise transcriptions are on the outside, as indicated by the grey arrows. The color coding corresponds to genes of different groups as listed in the key to the bottom right. The GC content is shown in the inner grey circle. The map was drawn using OGDRAW<sup>1</sup>.

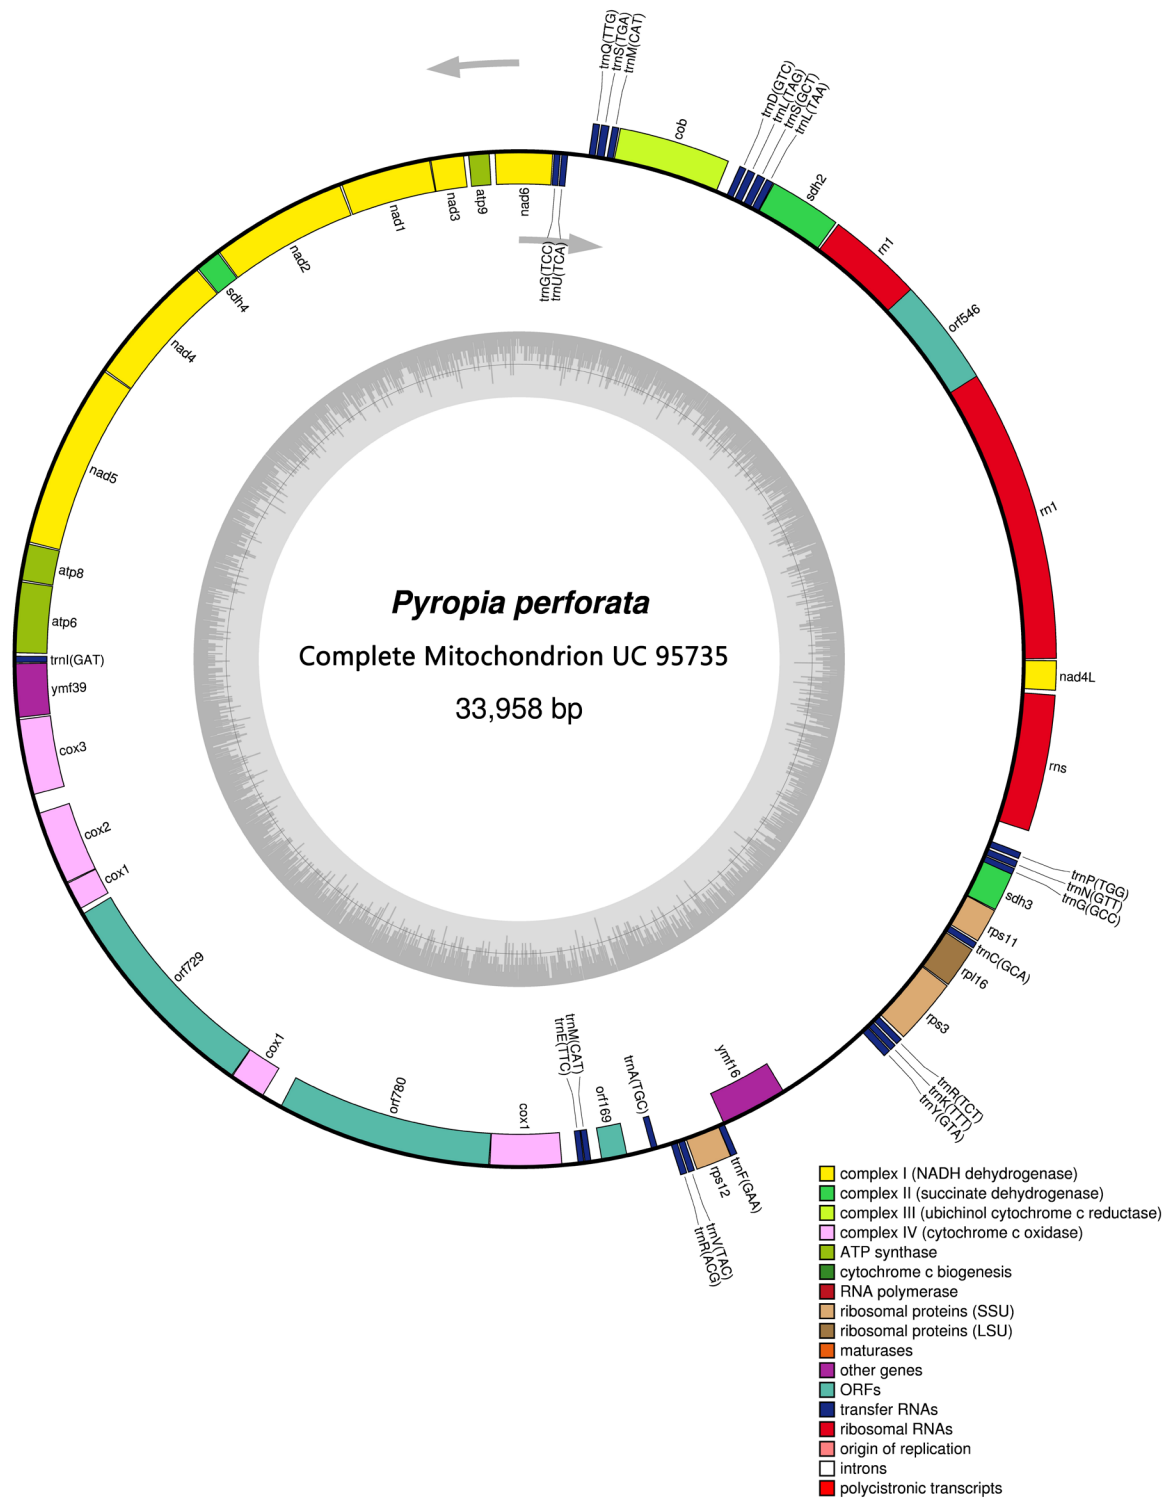

**Supplementary Figure 10.** The circular-mapping mitochondrial genome of *Pyropia perforata* (UC 95735, Punta San Roque, Baja California Sur). Features transcribed clockwise are on the inside, while counter-clockwise transcriptions are on the outside, as indicated by the grey arrows. The color coding corresponds to genes of different groups as listed in the key to the bottom right. The GC content is shown in the inner grey circle. The map was drawn using OGDRAW<sup>1</sup>.

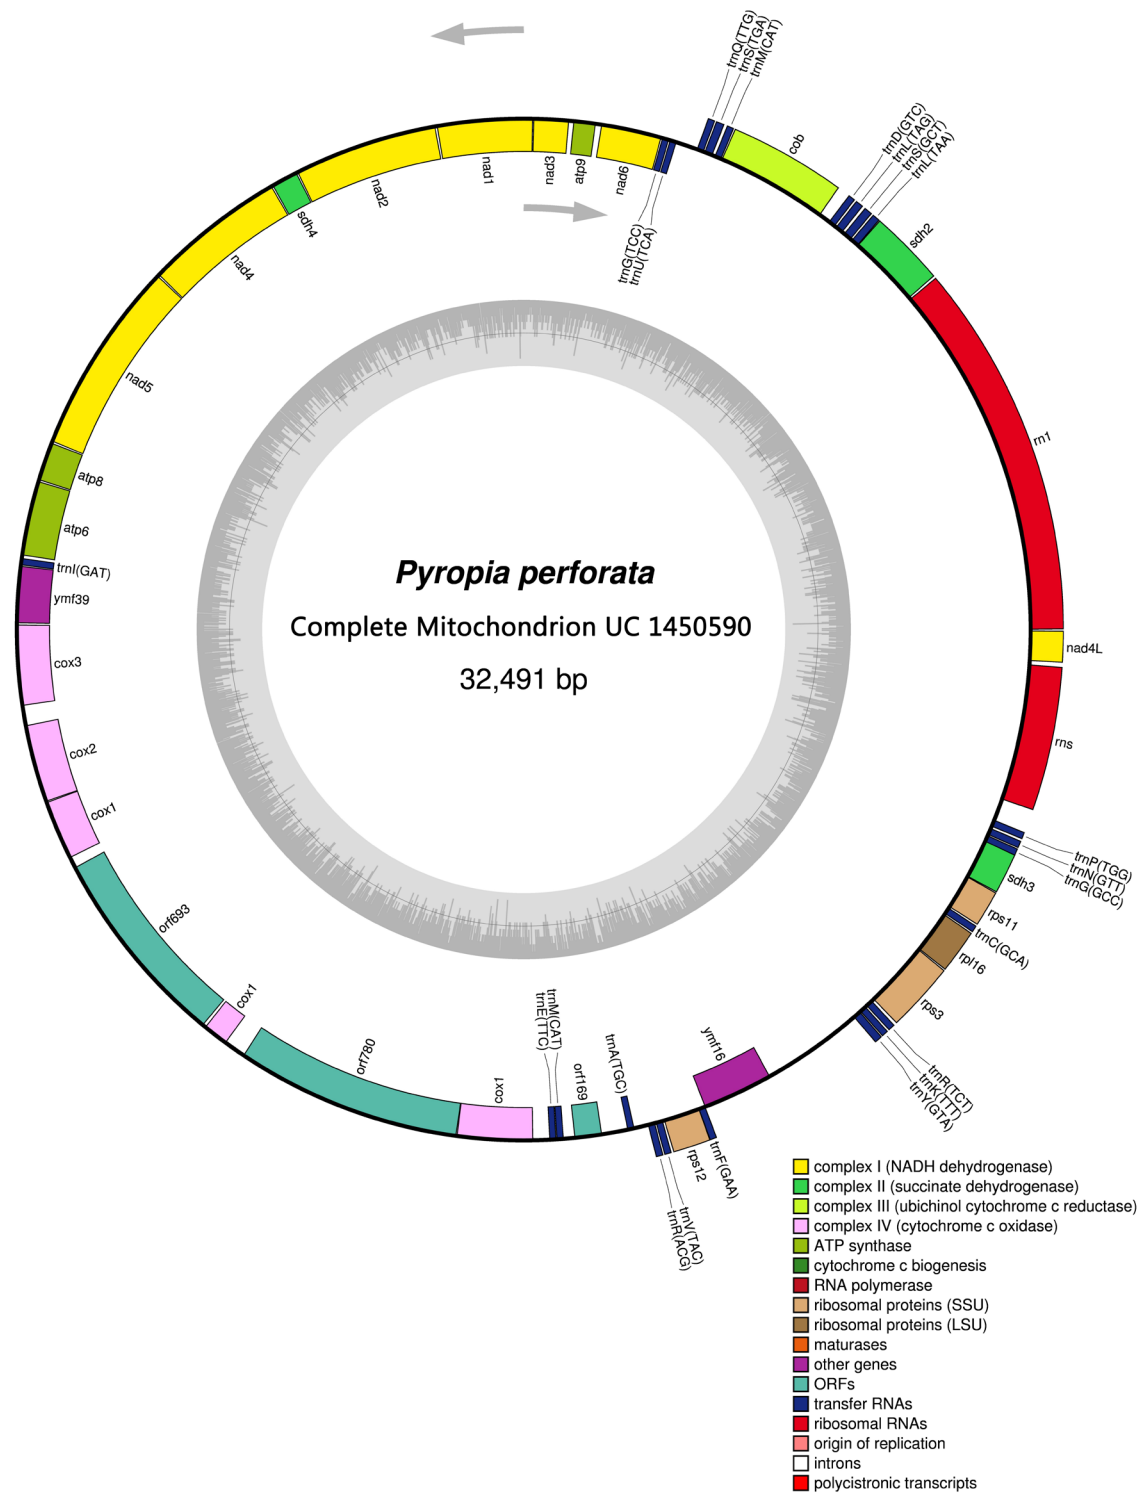

**Supplementary Figure 11.** The circular-mapping mitochondrial genome of *Pyropia perforata* (UC 1450590, Carmel, California). Features transcribed clockwise are on the inside, while counter-clockwise transcriptions are on the outside, as indicated by the grey arrows. The color coding corresponds to genes of different groups as listed in the key to the bottom right. The GC content is shown in the inner grey circle. The map was drawn using OGDRAW<sup>1</sup>.

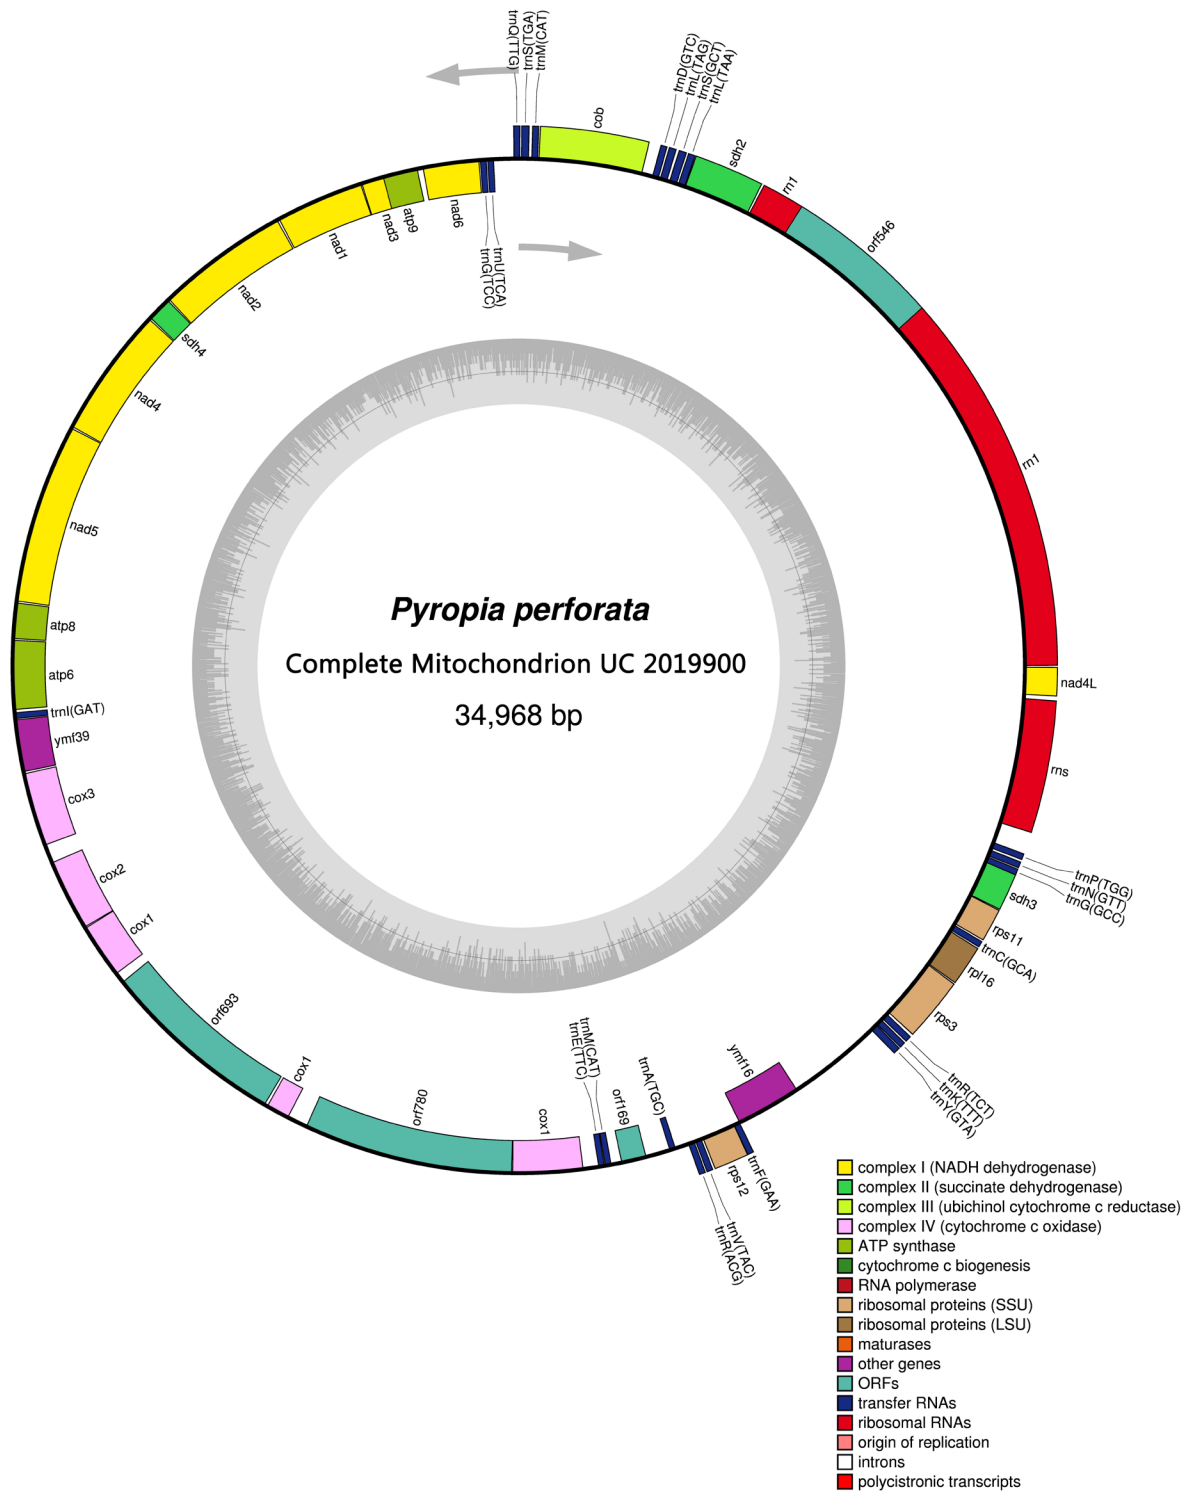

**Supplementary Figure 12.** The circular-mapping mitochondrial genome of *Pyropia perforata* (UC 201990, Tomales Bay, California). Features transcribed clockwise are on the inside, while counter-clockwise transcriptions are on the outside, as indicated by the grey arrows. The color coding corresponds to genes of different groups as listed in the key to the bottom right. The GC content is shown in the inner grey circle. The map was drawn using OGDRAW<sup>1</sup>.

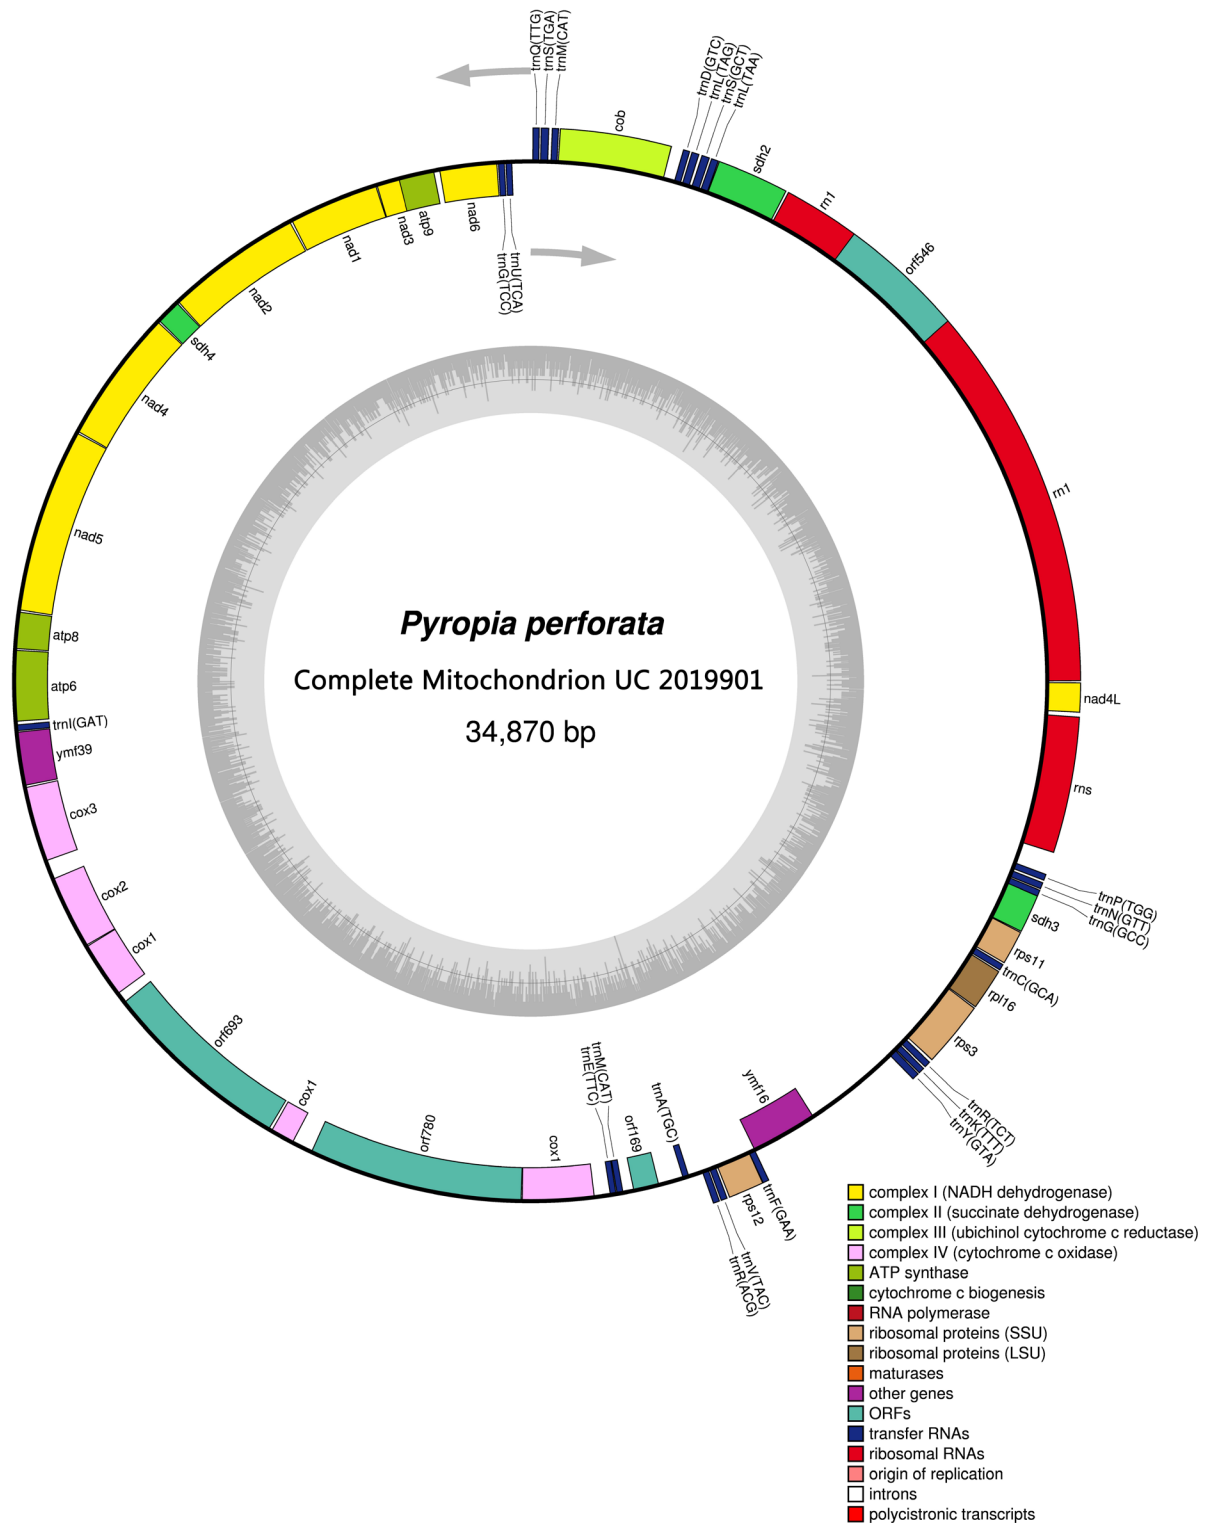

**Supplementary Figure 13.** The circular-mapping mitochondrial genome of *Pyropia perforata* (UC 201901, Near Turn Island, San Juan Island, Washington). Features transcribed clockwise are on the inside, while counter-clockwise transcriptions are on the outside, as indicated by the grey arrows. The color coding corresponds to genes of different groups as listed in the key to the bottom right. The GC content is shown in the inner grey circle. The map was drawn using OGDRAW<sup>1</sup>.



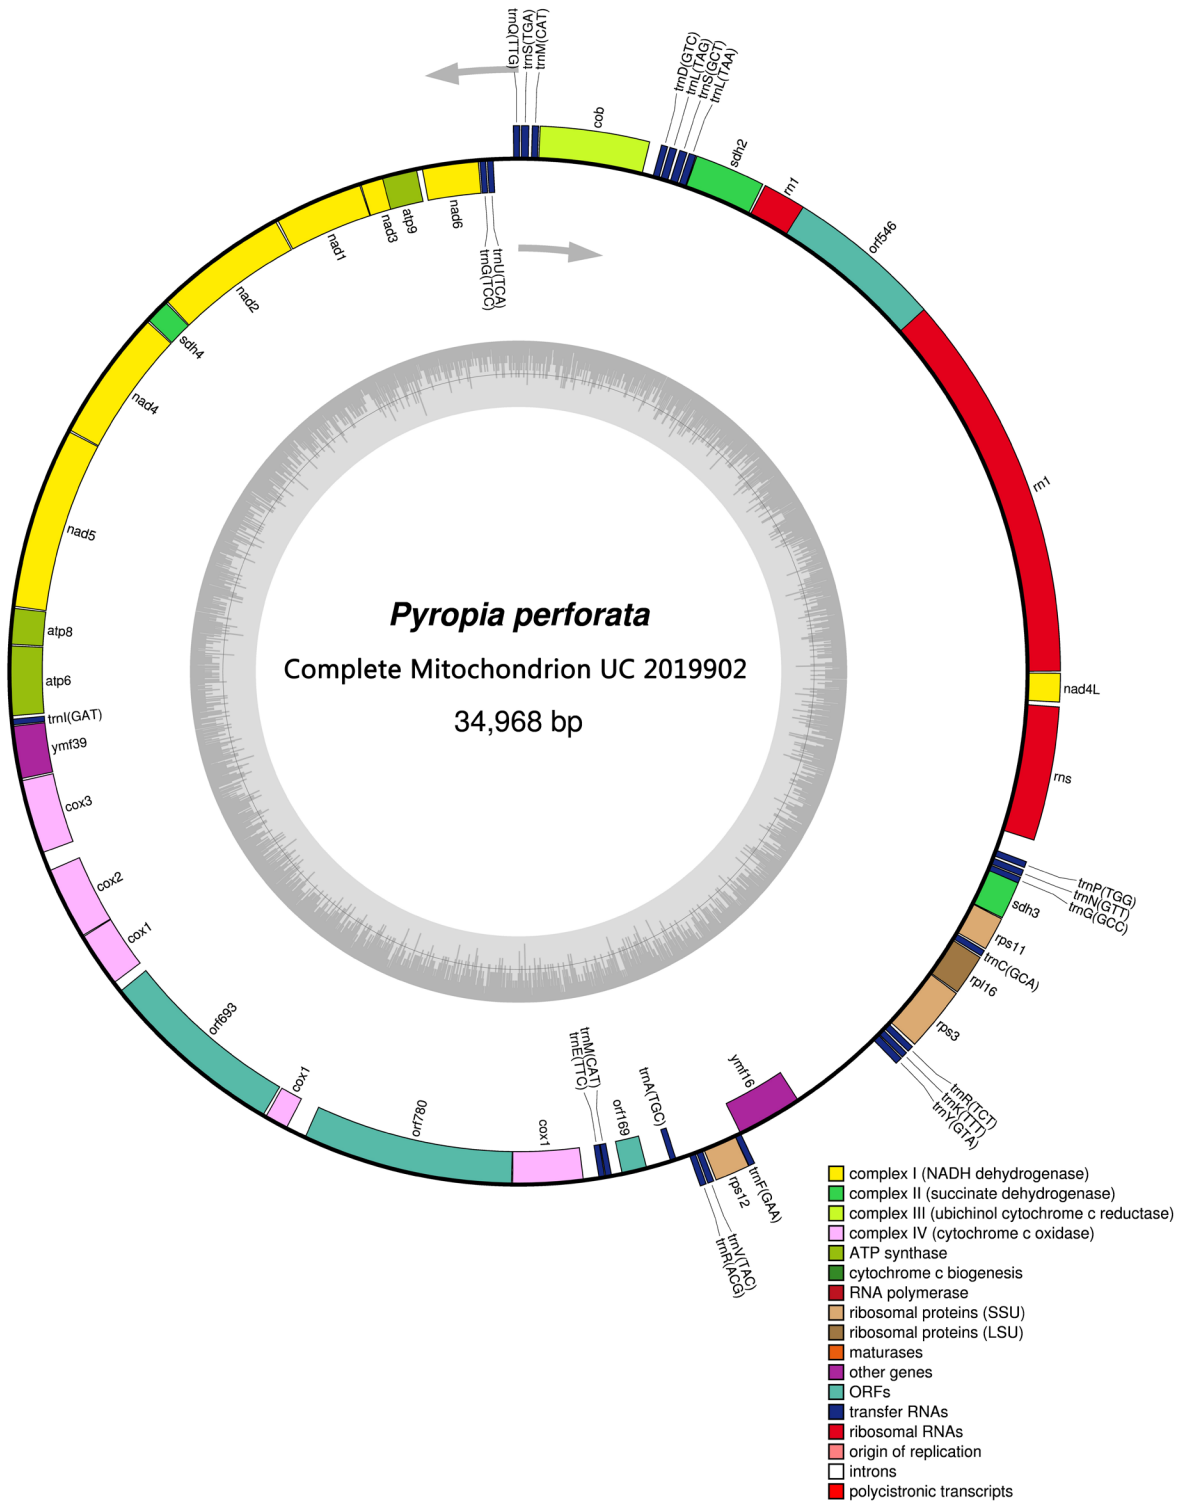

**Supplementary Figure 14.** The circular-mapping mitochondrial genome of *Pyropia perforata* (UC 2019902, Friday Harbor, San Juan Island, Washington). Features transcribed clockwise are on the inside, while counter-clockwise transcriptions are on the outside, as indicated by the grey arrows. The color coding corresponds to genes of different groups as listed in the key to the bottom right. The GC content is shown in the inner grey circle. The map was drawn using OGDRAW<sup>1</sup>.

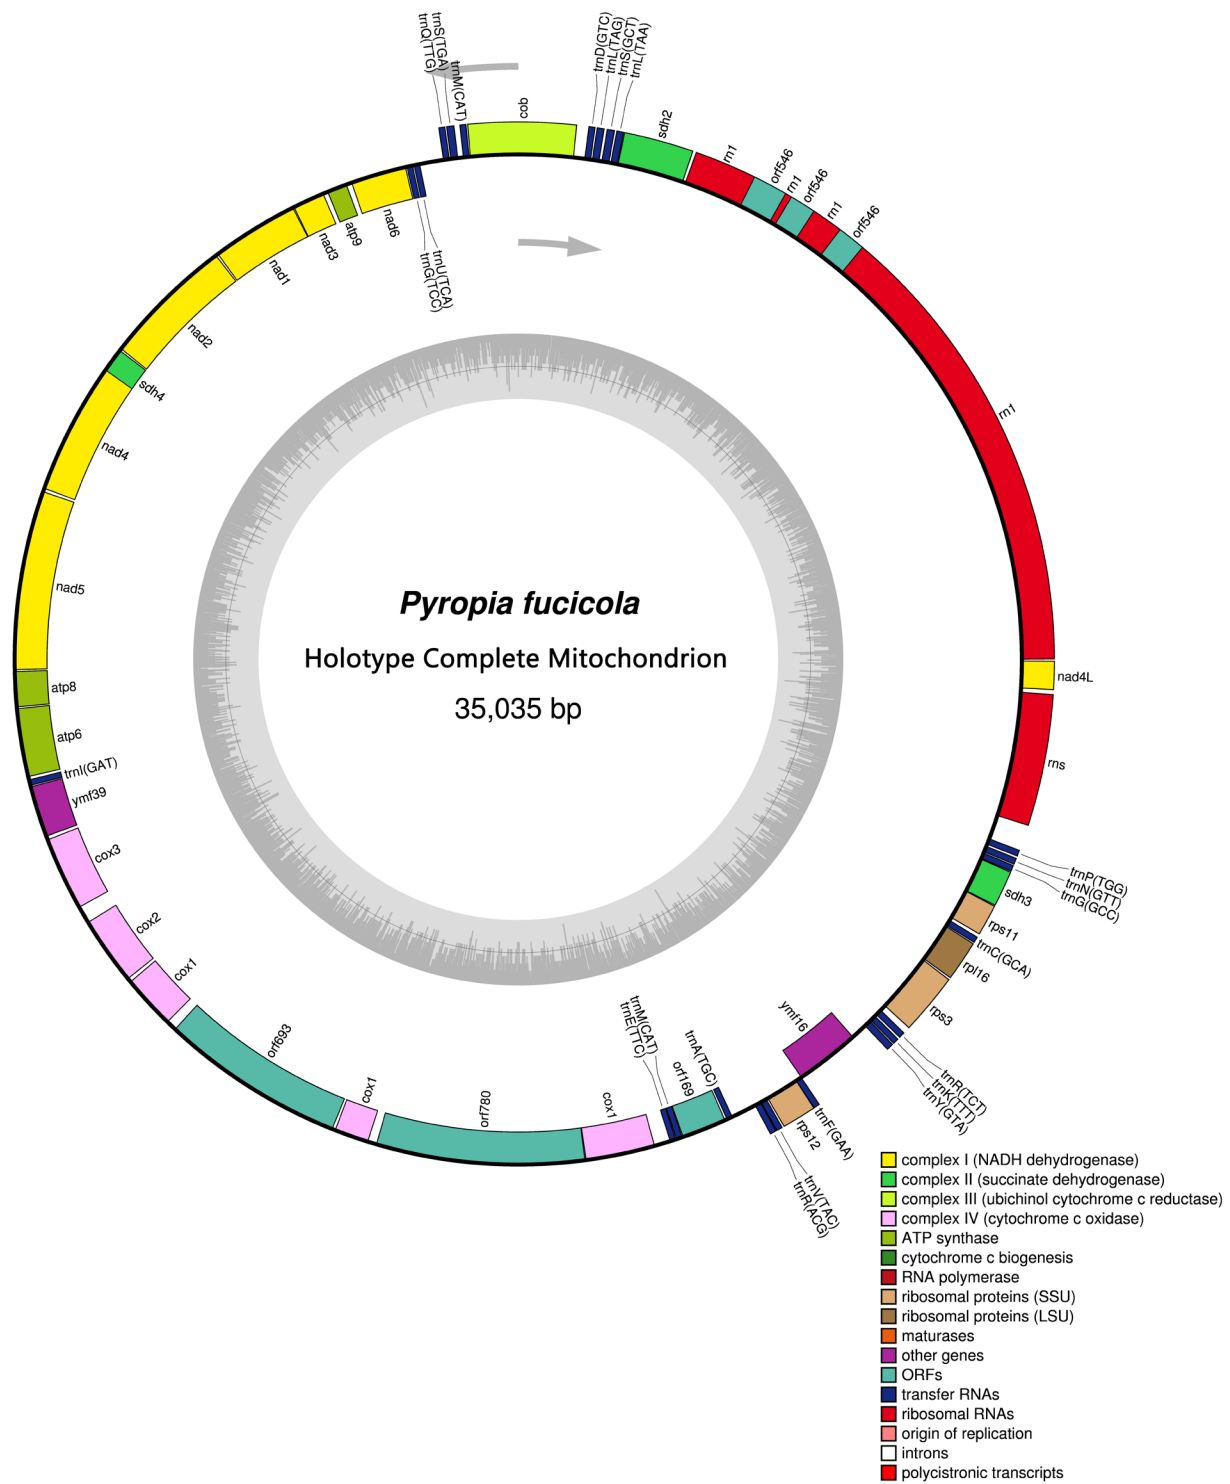

**Supplementary Figure 15.** The circular-mapping mitochondrial genome of the holotype specimen of *Pyropia fucicola* (VK-11-00121, Makah Bay, Washington). Features transcribed clockwise are on the inside, while counter-clockwise transcriptions are on the outside, as indicated by the grey arrows. The color coding corresponds to genes of different groups as listed in the key to the bottom right. The GC content is shown in the inner grey circle. The map was drawn using OGDRAW<sup>1</sup>.

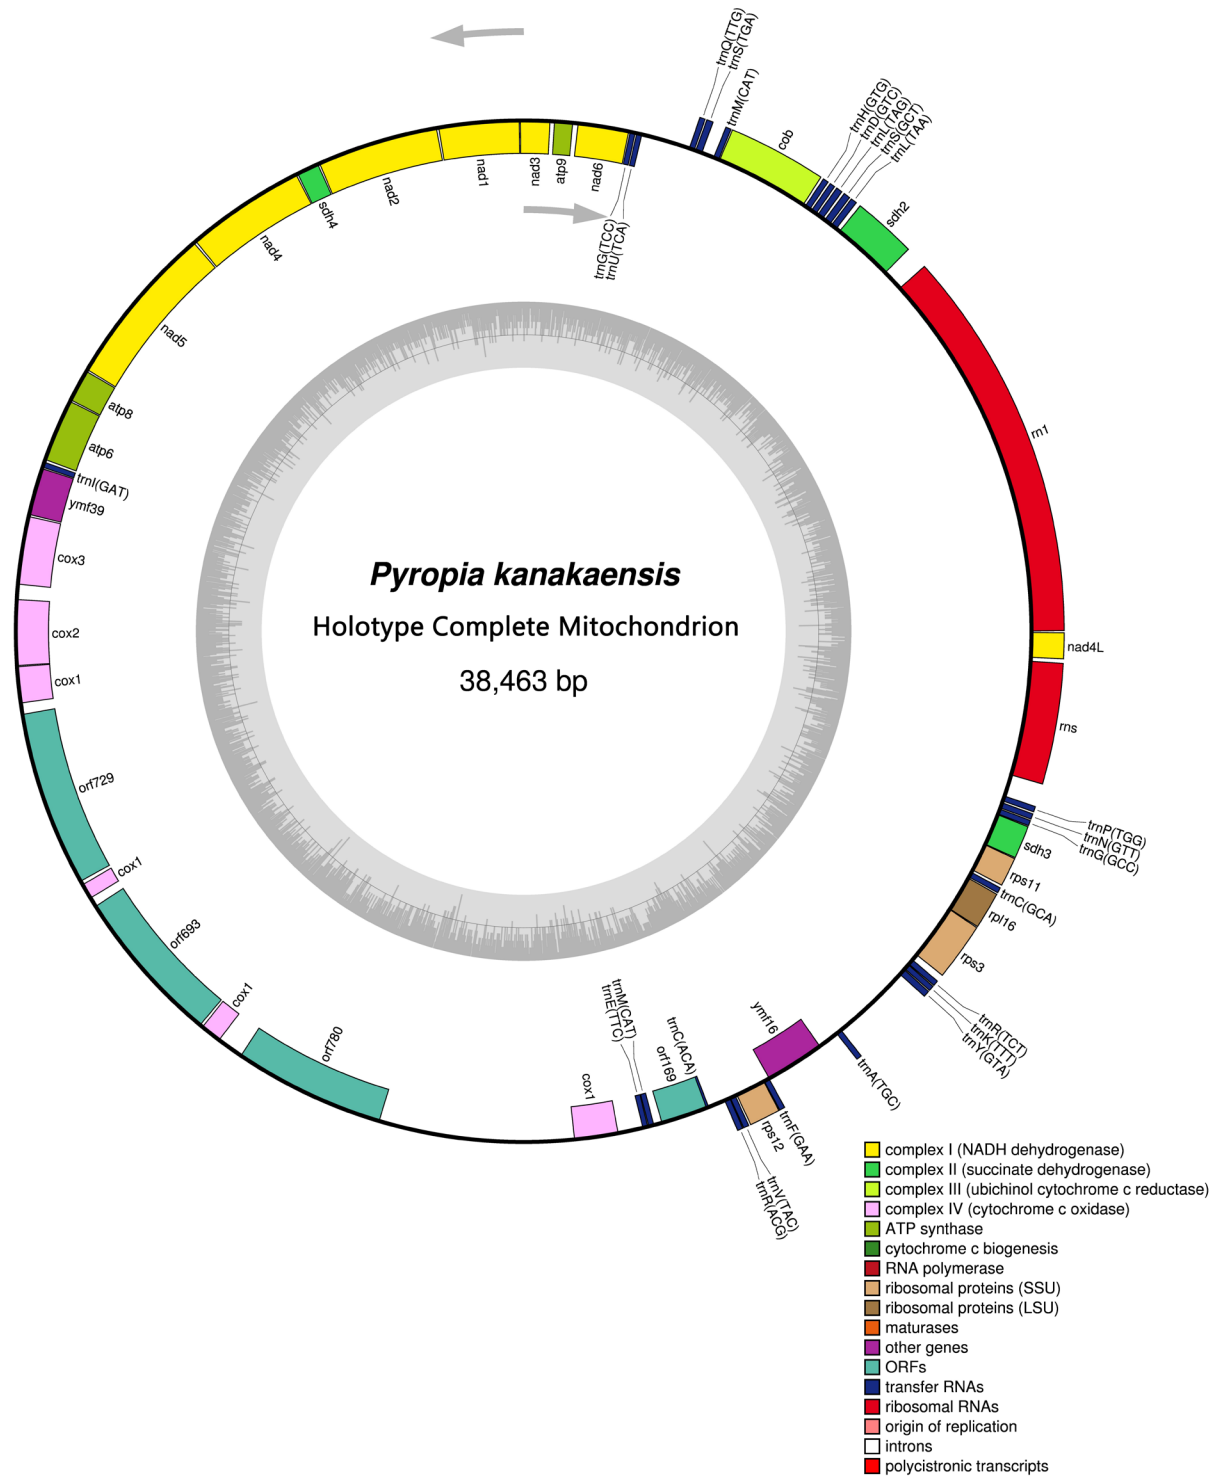

**Supplementary Figure 16.** The circular-mapping mitochondrial genome of the holotype specimen of *Pyropia kanakaensis* (Mumford #161, WTU 255136, Kanaka Bay, San Juan Is., Washington). Features transcribed clockwise are on the inside, while counter-clockwise transcriptions are on the outside, as indicated by the grey arrows. The color coding corresponds to genes of different groups as listed in the key to the bottom right. The GC content is shown in the inner grey circle. The map was drawn using OGDRAW<sup>1</sup>.

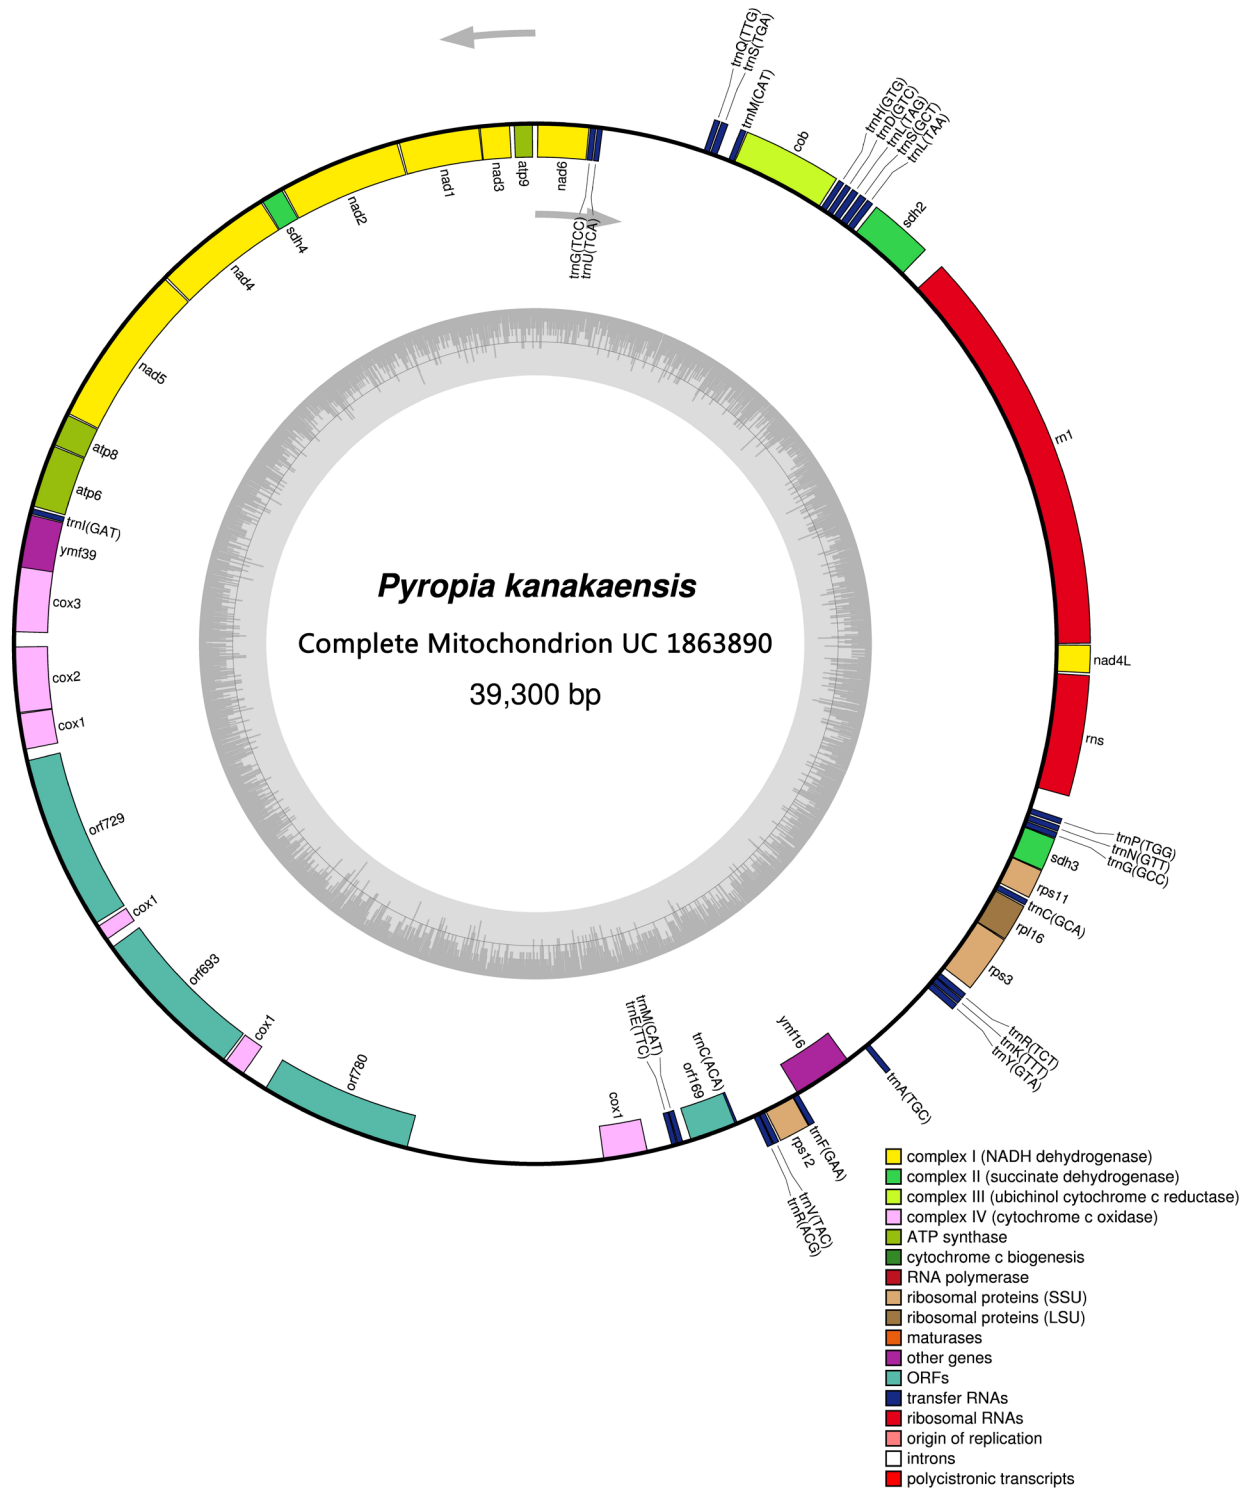

**Supplementary Figure 17.** The circular-mapping mitochondrial genome of *Pyropia kanakaensis* (UC 1863890, Land's End, San Francisco, California). Features transcribed clockwise are on the inside, while counter-clockwise transcriptions are on the outside, as indicated by the grey arrows. The color coding corresponds to genes of different groups as listed in the key to the bottom right. The GC content is shown in the inner grey circle. The map was drawn using OGDRAW<sup>1</sup>.

## Reference

1. Lohse, M., Drechsel, O. & Bock, R. Organellargedraw (ogdraw)– a tool for the easy generation of high-quality custom graphical maps of plastid and mitochondrial genomes. *Curr. Genet.* **52**, 267–274 (2007).

**Supplementary Table 1** Chloroplast gene content for *Porphyra perforata***Chloroplast Genomes**

| <b>Gene Groups</b>            | <b>Genes</b>                                                                                                                                                                                                                                                                                                                                 |
|-------------------------------|----------------------------------------------------------------------------------------------------------------------------------------------------------------------------------------------------------------------------------------------------------------------------------------------------------------------------------------------|
| Photosystem I                 | psaA, psaB, psaC, psaD, psaE, psaK, psaI, psaF, psaJ, psaL, psaM                                                                                                                                                                                                                                                                             |
| Photosystem II                | psbA, psbC, psbD, psbE, psbF, psbH, psbI, psbJ, psbK, psbL, psbN, psbT, psbV, psbW, psbX, psbY, psbZ                                                                                                                                                                                                                                         |
| Protochlorophyllide reductase | chlL, chlN, chlB, chlI-2                                                                                                                                                                                                                                                                                                                     |
| Phycobiliproteins             | apcA, apcB, apcD, apcE, apcF, cpeA, cpeB, cpcA, cpcB, cpcG                                                                                                                                                                                                                                                                                   |
| Cytochrome b/f complex        | petA, petB, petD, petF, petG, petJ, petL, petN                                                                                                                                                                                                                                                                                               |
| ATP synthase                  | atpA, atpB, atpD, atpE, atpF, atpG, atpH, atpI                                                                                                                                                                                                                                                                                               |
| RNA polymerase                | rpoA, rpoB, rpoC1, rpoC2                                                                                                                                                                                                                                                                                                                     |
| Ribosomal proteins (SSU)      | rps1, rps2, rps3, rps4, rps5, rps6, rps7, rps8, rps9, rps10, rps11, rps12, rps13, rps14, rps16, rps17, rps18, rps19, rps20                                                                                                                                                                                                                   |
| Ribosomal proteins (LSU)      | rpl1, rpl2, rpl3, rpl4, rpl5, rpl6, rpl9, rpl11, rpl12, rpl13, rpl14, rpl15, rpl16, rpl17, rpl18, rpl19, rpl20, rpl21, rpl22, rpl23, rpl24, rpl27, rpl28, rpl29, rpl31, rpl32, rpl33, rpl34, rpl35, rpl36                                                                                                                                    |
| Hypothetical chloroplast orfs | ycf3, ycf4, ycf12, ycf17, ycf19, ycf20, ycf21, ycf22, ycf23, ycf26, ycf28, ycf29, ycf33, ycf34, ycf35, ycf36, ycf37, ycf38, ycf39, ycf46, ycf59, ycf61, ycf63, ycf65                                                                                                                                                                         |
| Transfer RNAs                 | trnA-GGC, trnA-TGC, trnC-GCA, trnD-GTC, trnE-TTC, trnF-GAA, trnG-GCC, trnG-TCC, trnH-GTG, trnI-GAT, trnK-TTT, trnL-CAA, trnL-GAG, trnL-TAA, trnL-TAG, trnM-CAT(x3), trnN-GTT, trnP-TGG, trnQ-TTG, trnR-ACG, trnR-CCG, trnR-CCT, trnR-TCT, trnS-CGA, trnS-GCT, trnS-GGA, trnS-TGA, trnT-GGT, trnT-TGT, trnV-GAC, trnV-TAC, trnW-CCA, trnY-GTA |
| Ribosomal RNAs                | rrsA, rrlA, rrfB                                                                                                                                                                                                                                                                                                                             |
| Other genes                   | accA, accD, acpP, argB, bas1, carA, cbbx, ccs1, ccsA, cemA, clpC, dnaK, fabH, ftsH, glnB, gltB, groEL, ilvB, ilvH, infB, infC, moeB, nb1A, odpA, odpB, ompR, pbsA, pgmA, preA, rbcL, rbcR, rbcS, rne, secA, secY, sufB, sufC, syfB, syh, tatC, thiG, trpA, trpG, trxA, tsf, tufa                                                             |
| Open reading frames           | orf36, orf49, orf58, orf62, orf68, orf71(x2), orf75, orf107, orf108, orf111, orf114, orf121, orf148, orf149, orf174, orf198, orf203, orf238, orf240, orf263, orf287, orf320, orf327, orf382, orf450, orf565, orf621                                                                                                                          |

## Supplementary Table 2 Pairwise distances for chloroplast genomes analyzed in this study

|                                    | Sanjuanensis Holotype VK-11-00061 | Perforata Lectotype LD-Ag 13037 | Perforata Syntype LD-Ag 13038 | Perforata Tomales Bay UC 2019900 | Perforata San Juan Is. UC 2019901 | Perforata Friday Harbor UC 2019902 | Perforata Syntype LD-Ag 13031 | Perforata Syntype LD-Ag 13032 |
|------------------------------------|-----------------------------------|---------------------------------|-------------------------------|----------------------------------|-----------------------------------|------------------------------------|-------------------------------|-------------------------------|
| Sanjuanensis Holotype VK-11-00061  | 0                                 |                                 |                               |                                  |                                   |                                    |                               |                               |
| Perforata Lectotype LD-Ag 13037    | 0.000390                          | 0                               |                               |                                  |                                   |                                    |                               |                               |
| Perforata Syntype LD-Ag 13038      | 0.000380                          | 0.000011                        | 0                             |                                  |                                   |                                    |                               |                               |
| Perforata Tomales Bay UC 2019900   | 0.000527                          | 0.000506                        | 0.00050                       | 0                                |                                   |                                    |                               |                               |
| Perforata San Juan Is. UC 2019901  | 0.000627                          | 0.000606                        | 0.00060                       | 0.000459                         | 0                                 |                                    |                               |                               |
| Perforata Friday Harbor UC 2019902 | 0.000511                          | 0.000490                        | 0.00048                       | 0.000322                         | 0.000432                          | 0                                  |                               |                               |
| Perforata Syntype LD-Ag 13031      | 0.000775                          | 0.000754                        | 0.00074                       | 0.000606                         | 0.000664                          | 0.000590                           | 0                             |                               |
| Perforata Syntype LD-Ag 13032      | 0.000786                          | 0.000764                        | 0.00075                       | 0.000617                         | 0.000675                          | 0.000601                           | 0.000021                      | 0                             |
| Perforata Carmel UC 1450590        | 0.000743                          | 0.000722                        | 0.00071                       | 0.000575                         | 0.000633                          | 0.000559                           | 0.000580                      | 0.000601                      |
| Segregata Syntype UC 807662        | 0.000923                          | 0.000902                        | 0.00089                       | 0.000754                         | 0.000812                          | 0.000738                           | 0.000664                      | 0.000686                      |
| Segregata Syntype UC 95739         | 0.000928                          | 0.000907                        | 0.00090                       | 0.000759                         | 0.000817                          | 0.000744                           | 0.000670                      | 0.000691                      |
| Perforata Baja California UC 95735 | 0.005331                          | 0.005294                        | 0.00528                       | 0.005150                         | 0.005209                          | 0.005146                           | 0.005081                      | 0.005103                      |
| Haitanensis JQ736808.1             | 0.118000                          | 0.118052                        | 0.11804                       | 0.117978                         | 0.118050                          | 0.117947                           | 0.118012                      | 0.117997                      |
| Yezoensis JQ736809.1               | 0.140834                          | 0.140884                        | 0.14087                       | 0.140684                         | 0.140756                          | 0.140688                           | 0.140664                      | 0.140687                      |
| Fucicola Holotype WTU 255128       | 0.145310                          | 0.145323                        | 0.14531                       | 0.145166                         | 0.145251                          | 0.145164                           | 0.145213                      | 0.145237                      |
| Kanakaensis Holotype WTU 255136    | 0.144224                          | 0.144241                        | 0.14423                       | 0.144193                         | 0.144240                          | 0.144195                           | 0.144144                      | 0.144144                      |
| Porphyra purpurea AF114794.1       | 0.197095                          | 0.197139                        | 0.19712                       | 0.197031                         | 0.197074                          | 0.196967                           | 0.197132                      | 0.197132                      |
| Porphyra umbilicalis JQ388471.1    | 0.192228                          | 0.192288                        | 0.19227                       | 0.192123                         | 0.193351                          | 0.192891                           | 0.192956                      | 0.192955                      |

| Perforata Carmel UC<br>1450590 | Segregata Syntype UC<br>807662 | Segregata Syntype UC<br>95739 | Perforata Baja California<br>UC 95735 | Haitanensis<br>JQ736808.1 | Yezoensis<br>JQ736809.1 | Fucicola Holotype WTU<br>255128 | Kanakaensis Holotype<br>WTU 255136 | Porphyra purpurea<br>AF114794.1 | Porphyra umbilicalis<br>JQ388471.1 |
|--------------------------------|--------------------------------|-------------------------------|---------------------------------------|---------------------------|-------------------------|---------------------------------|------------------------------------|---------------------------------|------------------------------------|
|--------------------------------|--------------------------------|-------------------------------|---------------------------------------|---------------------------|-------------------------|---------------------------------|------------------------------------|---------------------------------|------------------------------------|

|          |          |          |          |          |          |          |          |          |   |
|----------|----------|----------|----------|----------|----------|----------|----------|----------|---|
| 0        |          |          |          |          |          |          |          |          |   |
| 0.000717 | 0        |          |          |          |          |          |          |          |   |
| 0.000722 | 0.000005 | 0        |          |          |          |          |          |          |   |
| 0.005134 | 0.005067 | 0.005072 | 0        |          |          |          |          |          |   |
| 0.118002 | 0.117781 | 0.117927 | 0.118544 | 0        |          |          |          |          |   |
| 0.140750 | 0.140602 | 0.140620 | 0.140991 | 0.118193 | 0        |          |          |          |   |
| 0.145247 | 0.145071 | 0.145089 | 0.145550 | 0.121335 | 0.033753 | 0        |          |          |   |
| 0.144196 | 0.144091 | 0.144110 | 0.144516 | 0.117789 | 0.128832 | 0.128989 | 0        |          |   |
| 0.196999 | 0.196854 | 0.196869 | 0.197360 | 0.179847 | 0.181160 | 0.187107 | 0.190509 | 0        |   |
| 0.192818 | 0.203253 | 0.203253 | 0.203671 | 0.185190 | 0.181699 | 0.187910 | 0.191267 | 0.083348 | 0 |



**Supplementary Table 3** Mitochondrial gene content for the type specimens of *Porphyra perforata*, *Porphyra perforata* f. *segregata*, *Porphyra sanjuanensis*, *Porphyra fucicola*, and *Porphyra kanakaensis*

**Mitochondrial Genomes**

| <b>Gene Groups</b>                    | <b>Genes</b>                                                                                                                                                                                                                                                          |
|---------------------------------------|-----------------------------------------------------------------------------------------------------------------------------------------------------------------------------------------------------------------------------------------------------------------------|
| NADH dehydrogenase                    | nad1, nad2, nad3, nad4, nad4L, nad5, nad6                                                                                                                                                                                                                             |
| Succinate cytochrome c oxidoreductase | sdh2, sdh3, sdh4                                                                                                                                                                                                                                                      |
| Ubichinol cytochrome c reductase      | cob                                                                                                                                                                                                                                                                   |
| Cytochrome c oxidase                  | cox1(x2) <sup>a</sup> , cox2, cox3                                                                                                                                                                                                                                    |
| ATP synthase                          | atp6, atp8, atp9                                                                                                                                                                                                                                                      |
| ORFs                                  | orf169, orf546 <sup>b</sup> , orf693 <sup>c</sup> , orf729 <sup>d</sup> , orf780, orf813 <sup>e</sup>                                                                                                                                                                 |
| Ribosomal proteins (SSU)              | rps3, rps11, rps12                                                                                                                                                                                                                                                    |
| Ribosomal proteins (LSU)              | rpl16                                                                                                                                                                                                                                                                 |
| Other genes                           | ymf16, ymf39                                                                                                                                                                                                                                                          |
| Transfer RNAs                         | trnM-CAT(x2), trnS-TGA, trnS-GCT, trnL-TAA, trnL-TAG, trnQ-TTG, trnD-GTC, trnR-ACG, trnR-TCT, trnV-TAC, trnA-TGC, trnP-TGG, trnU-TCA, trnG-TCC, trnG-GCC, trnC-GCA <sup>f</sup> , trnN-GTT, trnK-TTT, trnF-GAA, trnY-GTA, trnE-TTC, trnI-GAT, trnH-GTG <sup>g</sup> . |
| Ribosomal RNAs                        | rrnl(x2), rns                                                                                                                                                                                                                                                         |

<sup>a</sup> cox1 is represented by 3 exons in *P. fucicola* and 4 exons in *P. kanakaensis*

<sup>b</sup> orf546 is not present in *P. kanakaensis*, but is represented by 3 intronic orfs in *P. sanjuanensis* and *P. fucicola*, 2 in *P. segregata*, and 1 in *P. perforata*

<sup>c</sup> orf693 is not present in *P. segregata*

<sup>d</sup> orf729 is present in *P. kanakaensis*

<sup>e</sup> orf813 is present in *P. sanjuanensis*

<sup>f</sup> trnC-ACA in *P. kanakaensis*

<sup>g</sup> trnH-GTG is present in *P. segregata* and *P. kanakaensis*

## Supplementary Table 4 Pairwise distances for mitochondrial genomes analyzed in this study

|                                    | Perforata Syntype LD-Ag 13038 | Perforata Lectotype LD-Ag 13037 | Perforata Carmel UC 1450590 | Perforata Tomales Bay UC 2019900 | Kanakaensis San Franc. UC 1863890 | Kanakaensis Holotype WTU 255136 |
|------------------------------------|-------------------------------|---------------------------------|-----------------------------|----------------------------------|-----------------------------------|---------------------------------|
| Perforata Syntype LD-Ag 13038      | 0                             |                                 |                             |                                  |                                   |                                 |
| Perforata Lectotype LD-Ag 13037    | 0.00005897                    | 0                               |                             |                                  |                                   |                                 |
| Perforata Carmel UC 1450590        | 0.00326428                    | 0.00323253                      | 0                           |                                  |                                   |                                 |
| Perforata Tomales Bay UC 2019900   | 0.02288324                    | 0.02285323                      | 0.00237473                  | 0                                |                                   |                                 |
| Kanakaensis San Franc. UC 1863890  | 0.28309746                    | 0.28302199                      | 0.2659347                   | 0.27422198                       | 0                                 |                                 |
| Kanakaensis Holotype WTU 255136    | 0.27752039                    | 0.27744451                      | 0.26249699                  | 0.26862549                       | 0.00388726                        | 0                               |
| Fucicola Holotype WTU 255128       | 0.1963746                     | 0.19633767                      | 0.20428958                  | 0.21640519                       | 0.29263438                        | 0.28715291                      |
| Tenera KC750917.1                  | 0.26914495                    | 0.26906905                      | 0.27326727                  | 0.28050192                       | 0.28260101                        | 0.27807815                      |
| Yezoensis JQ736809.1               | 0.31141588                    | 0.31113731                      | 0.29596773                  | 0.27954675                       | 0.34989783                        | 0.34300299                      |
| Haitanensis JQ736808.1             | 0.29554889                    | 0.29546391                      | 0.28036215                  | 0.26319045                       | 0.2852639                         | 0.28025561                      |
| Perforata Baja California UC 95735 | 0.06407257                    | 0.06407408                      | 0.04531013                  | 0.04249629                       | 0.25107255                        | 0.24534104                      |
| Perforata Friday Harbor UC 2019902 | 0.02294085                    | 0.02291085                      | 0.00256032                  | 0.00105911                       | 0.27394036                        | 0.26838354                      |
| Perforata San Juan Is. UC 2019901  | 0.02250169                    | 0.02247167                      | 0.00312627                  | 0.00247152                       | 0.27410176                        | 0.26850049                      |
| Sanjuanensis Holotype VK-11-00061  | 0.02244734                    | 0.02241636                      | 0.00466476                  | 0.00447662                       | 0.26940396                        | 0.26387907                      |
| Perforata Syntype LD-Ag 13032      | 0.00495917                    | 0.00492774                      | 0.00437461                  | 0.02513519                       | 0.24400344                        | 0.2382571                       |
| Perforata Syntype LD-Ag 13031      | 0.00505447                    | 0.00502303                      | 0.00447473                  | 0.02522944                       | 0.24393482                        | 0.23814641                      |
| Segregata Syntype UC 95739         | 0.02572674                    | 0.02569496                      | 0.0067327                   | 0.00690032                       | 0.23875846                        | 0.23285066                      |
| Segregata Syntype UC 807662        | 0.0258259                     | 0.02579413                      | 0.00679975                  | 0.0069933                        | 0.23884217                        | 0.23293472                      |
| Porphyra purpurea AF114794.1       | 0.36892329                    | 0.36879224                      | 0.38644704                  | 0.35987908                       | 0.41458829                        | 0.3958339                       |
| Porphyra umbilicalis JQ388471.1    | 0.34084485                    | 0.34070469                      | 0.36002582                  | 0.36051447                       | 0.36477604                        | 0.35792343                      |

Fucicola Holotype WTU 255128

Tenera KC750917.1

Yezoensis JQ736809.1

Haitanensis JQ736808.1

Perforata Baja California UC 95735

Perforata Friday Harbor UC 2019902

Perforata San Juan Is. UC 2019901

0

0.11128623

0.14632734

0.30120723

0.26939315

0.21594256

0.21589245

0.21588138

0.20498989

0.20517545

0.2322716

0.23240079

0.3592354

0.33652915

0

0.12831018

0.26975302

0.24205605

0.27983465

0.27866551

0.28086398

0.23423737

0.23423003

0.26360975

0.2636486

0.39064764

0.36313187

0

0.26826708

0.24144558

0.27896123

0.28035668

0.32258394

0.27437262

0.27431808

0.25475137

0.25479264

0.40107181

0.38881423

0

0.22147197

0.26266698

0.26417153

0.2640384

0.25805037

0.25812802

0.23721793

0.23725876

0.38940047

0.39374179

0

0.04242729

0.04312727

0.04498024

0.0314175

0.031384

0.01208651

0.01218357

0.33823856

0.33688359

0

0.00252911

0.00447645

0.02526107

0.02535531

0.00689993

0.00699292

0.35950956

0.36029128

0

0.00244297

0.02468681

0.024781

0.00465903

0.00475201

0.36129795

0.36214572

Sanjuanensis Holotype VK-11-00061    Perforata Syntype LD-Ag 13032    Perforata Syntype LD-Ag 13031    Segregata Syntype UC 95739    Segregata Syntype UC 807662    Porphyra purpurea AF114794.1    Porphyra umbilicalis JQ388471.1

|            |            |            |            |            |            |   |
|------------|------------|------------|------------|------------|------------|---|
| 0          |            |            |            |            |            |   |
| 0.02456192 | 0          |            |            |            |            |   |
| 0.02465608 | 0.00009189 | 0          |            |            |            |   |
| 0.01860783 | 0.02254028 | 0.02256322 | 0          |            |            |   |
| 0.01869563 | 0.02263589 | 0.02265879 | 0.00008538 | 0          |            |   |
| 0.3669525  | 0.38524783 | 0.38508974 | 0.36420718 | 0.36425691 | 0          |   |
| 0.3682213  | 0.35963193 | 0.35953089 | 0.36580495 | 0.36579203 | 0.15665674 | 0 |

## Supplementary Table 5 Comparison of circular genomes to sequences deposited in GenBank

### Specimen

LD-Ag 13037, *P. perforata* lectotype  
 LD-Ag 13038, *P. perforata* syntype  
 LD-Ag 13031, *P. perforata* syntype  
 LD-Ag 13032, *P. perforata* syntype  
 UC 807662, *P. perforata* f. *segregata* syntype  
 UC 95739, *P. perforata* f. *segregata* syntype  
 UC 95735 *P. perforata*  
 UC 1450590 *P. perforata*  
 UC 2019900 *P. perforata*  
 UC 2019901 *P. perforata*  
 UC 2019902 *P. perforata*  
 VK-11-00061, *P. sanjuanensis* holotype  
 WTU 255136, *P. kanakaensis* holotype  
 UC 1863890 *P. kanakaensis*  
 VK-11-00121, *P. fucicola* holotype

### Identical *rbc L* sequences (Locality/GenBank Accessions)

Sitka, Alaska (AF452438), Afognak Is., Alaska (EU223132), Qualicum Bch., Brit. Col. (JN028996)  
 Sitka, Alaska (AF452438), Afognak Is., Alaska (EU223132), Qualicum Bch., Brit. Col. (JN028996)  
 Sitka, Alaska (AF452438), Afognak Is., Alaska (EU223132), Qualicum Bch., Brit. Col. (JN028996)  
 Sitka, Alaska (AF452438), Afognak Is., Alaska (EU223132), Qualicum Bch., Brit. Col. (JN028996)  
 No exact matches in GenBank, 1 bp diverged from the lectotype of *P. perforata*  
 No exact matches in GenBank, 1 bp diverged from the lectotype of *P. perforata*  
 No exact matches, nearest match is 6 bp diverged  
 Sitka, Alaska (AF452438), Afognak Is., Alaska (EU223132), Qualicum Bch., Brit. Col. (JN028996)  
 Sitka, Alaska (AF452438), Afognak Is., Alaska (EU223132), Qualicum Bch., Brit. Col. (JN028996)  
 No exact matches in GenBank, 1 bp diverged from the lectotype of *P. perforata*  
 No exact matches in GenBank, 2 bp diverged from the lectotype of *P. perforata*  
 Sitka, Alaska (AF452438), Afognak Is., Alaska (EU223132), Qualicum Bch., Brit. Col. (JN028996)  
 Sooke Harbour, Vancouver Is., Brit. Col. (JN028976)  
 No exact matches in GenBank, 2 bp diverged from the holotype of *P. kanakaensis*  
 No exact matches in GenBank, 1 bp diverged from three specimens in GenBank

### Specimen

LD-Ag 13037, *P. perforata* lectotype  
 LD-Ag 13038, *P. perforata* syntype  
 LD-Ag 13031, *P. perforata* syntype  
 LD-Ag 13032, *P. perforata* syntype  
 UC 807662, *P. perforata* f. *segregata* syntype  
 UC 95739, *P. perforata* f. *segregata* syntype  
 UC 95735 *P. perforata*  
 UC 1450590 *P. perforata*  
 UC 2019900 *P. perforata*  
 UC 2019901 *P. perforata*  
 UC 2019902 *P. perforata*  
 VK-11-00061, *P. sanjuanensis* holotype  
 WTU 255136, *P. kanakaensis* holotype  
 UC 1863890 *P. kanakaensis*  
 VK-11-00121, *P. fucicola* holotype

### Identical CO1 (Locality/GenBank Accessions)

12 exact matches all from Brit. Col., identical to lectotype of *P. perforata*  
 12 exact matches all from Brit. Col., identical to lectotype of *P. perforata*  
 12 exact matches all from Brit. Col., identical to lectotype of *P. perforata*  
 12 exact matches all from Brit. Col., identical to lectotype of *P. perforata*  
 12 exact matches all from Brit. Col., identical to lectotype of *P. perforata*  
 12 exact matches all from Brit. Col., identical to lectotype of *P. perforata*  
 No exact matches, 3 bp diverged from the lectotype of *P. perforata*  
 12 exact matches all from Brit. Col., identical to lectotype of *P. perforata*  
 12 exact matches all from Brit. Col., identical to lectotype of *P. perforata*  
 12 exact matches all from Brit. Col., identical to lectotype of *P. perforata*  
 12 exact matches all from Brit. Col., identical to lectotype of *P. perforata*  
 Large ORF splitting COX1 gene, otherwise identical to *P. perforata*  
 Species not present in GenBank  
 Species not present in GenBank, 2 bp diverged from the holotype of *P. kanakaensis*  
 7 exact matches all from British Columbia

### Specimen

LD-Ag 13037, *P. perforata* lectotype  
 LD-Ag 13038, *P. perforata* syntype  
 LD-Ag 13031, *P. perforata* syntype  
 LD-Ag 13032, *P. perforata* syntype  
 UC 807662, *P. perforata* f. *segregata* syntype  
 UC 95739, *P. perforata* f. *segregata* syntype  
 UC 95735 *P. perforata*  
 UC 1450590 *P. perforata*  
 UC 2019900 *P. perforata*  
 UC 2019901 *P. perforata*  
 UC 2019902 *P. perforata*  
 VK-11-00061, *P. sanjuanensis* holotype  
 WTU 255136, *P. kanakaensis* holotype  
 UC 1863890 *P. kanakaensis*  
 VK-11-00121, *P. fucicola* holotype

### Identical UPA (Locality/GenBank Accessions)

Mazarredo Is., Brit. Col. (JN029132), Tswassen Ferry Terminal, Brit. Col. (JN029133)  
 Mazarredo Is., Brit. Col. (JN029132), Tswassen Ferry Terminal, Brit. Col. (JN029133)  
 Mazarredo Is., Brit. Col. (JN029132), Tswassen Ferry Terminal, Brit. Col. (JN029132)  
 Mazarredo Is., Brit. Col. (JN029132), Tswassen Ferry Terminal, Brit. Col. (JN029132)  
 Mazarredo Is., Brit. Col. (JN029132), Tswassen Ferry Terminal, Brit. Col. (JN029132)  
 Mazarredo Is., Brit. Col. (JN029132), Tswassen Ferry Terminal, Brit. Col. (JN029132)  
 Mazarredo Is., Brit. Col. (JN029132), Tswassen Ferry Terminal, Brit. Col. (JN029132)  
 Mazarredo Is., Brit. Col. (JN029132), Tswassen Ferry Terminal, Brit. Col. (JN029132)  
 Mazarredo Is., Brit. Col. (JN029132), Tswassen Ferry Terminal, Brit. Col. (JN029132)  
 Mazarredo Is., Brit. Col. (JN029132), Tswassen Ferry Terminal, Brit. Col. (JN029132)  
 Mazarredo Is., Brit. Col. (JN029132), Tswassen Ferry Terminal, Brit. Col. (JN029132)  
 Mazarredo Is., Brit. Col. (JN029132), Tswassen Ferry Terminal, Brit. Col. (JN029132)  
 Mazarredo Is., Brit. Col. (JN029132), Tswassen Ferry Terminal, Brit. Col. (JN029132)  
 Mazarredo Is., Brit. Col. (JN029132), Tswassen Ferry Terminal, Brit. Col. (JN029132)  
 Mazarredo Is., Brit. Col. (JN029132), Tswassen Ferry Terminal, Brit. Col. (JN029132)  
 Pachena Beach, Brit. Col. (JN029107), Whiffen Spit, Vancouver Is., Brit. Col. (JN029108)  
 Pachena Beach, Brit. Col. (JN029107), Whiffen Spit, Vancouver Is., Brit. Col. (JN029108)  
 No exact matches in GenBank, 2 bp diverged from one specimen
